# Supplementary material for: Characterizing the Potato Growing Regions in India Using Meteorological Parameters
Source: MDPI journal article supplement (doi:10.3390/life12101619), 2022-10-17
Supplement: s1 [file s1]

**Suppl. File:**

Details of 15 Classes classified based on meteorological variables of 1253 potato growing locations in the country.

**Class #1(Locations: 386)**

| Sr No | Station     | Latitude | Longitude | Altitude | P days (7,21,30) | GDD (4 deg C base temp) | Mean Night temp | Mean T | Mean Radiation (Kj/day/m2) |
|-------|-------------|----------|-----------|----------|------------------|-------------------------|-----------------|--------|----------------------------|
| 1     | Aliganj     | 26.90    | 80.94     | 108      | 600.35           | 1221.55                 | 14.79           | 18.95  | 18556.10                   |
| 2     | Alwar       | 27.55    | 76.63     | 261      | 898.05           | 1888.40                 | 15.97           | 19.77  | 18756.67                   |
| 3     | Ambah       | 26.70    | 78.22     | 166      | 875.47           | 1855.90                 | 15.47           | 19.50  | 19036.67                   |
| 4     | Amber       | 25.20    | 85.52     | 46       | 853.65           | 1749.05                 | 14.76           | 18.61  | 18273.33                   |
| 5     | Amethi      | 26.15    | 81.81     | 93       | 854.71           | 1804.15                 | 14.86           | 19.07  | 18906.67                   |
| 6     | Antah       | 25.15    | 76.31     | 243      | 916.50           | 1983.80                 | 20.32           | 20.57  | 19090.83                   |
| 7     | Anupshahr   | 28.35    | 78.26     | 196      | 710.84           | 1416.50                 | 14.28           | 18.21  | 18070.00                   |
| 8     | Aonla       | 28.26    | 79.16     | 167      | 919.49           | 1774.95                 | 15.57           | 18.82  | 18285.00                   |
| 9     | Arrah       | 25.56    | 84.66     | 53       | 932.49           | 1823.10                 | 15.67           | 19.23  | 19168.33                   |
| 10    | Atrauli     | 28.03    | 78.29     | 189      | 708.74           | 1400.20                 | 14.23           | 18.18  | 18108.08                   |
| 11    | Auraiya     | 26.46    | 79.51     | 137      | 677.25           | 1356.75                 | 14.84           | 18.79  | 18384.78                   |
| 12    | Ayodhya     | 26.79    | 82.20     | 94       | 900.21           | 1775.15                 | 14.78           | 18.83  | 19050.83                   |
| 13    | Azamgarh    | 26.07    | 83.19     | 74       | 878.19           | 1802.85                 | 14.85           | 19.06  | 19223.33                   |
| 14    | Badausa     | 25.21    | 80.60     | 114      | 879.27           | 1858.60                 | 15.44           | 19.52  | 19308.33                   |
| 15    | Badli       | 28.57    | 76.80     | 221      | 712.78           | 1399.30                 | 14.23           | 18.03  | 17968.00                   |
| 16    | Bagdogra    | 26.69    | 88.31     | 133      | 890.59           | 1955.85                 | 16.59           | 20.33  | 19150.83                   |
| 17    | Bagha       | 24.19    | 88.83     | 8        | 892.34           | 1869.95                 | 15.65           | 19.62  | 18733.33                   |
| 18    | Baghpat     | 28.94    | 77.22     | 217      | 621.96           | 1237.80                 | 15.36           | 19.14  | 18093.90                   |
| 19    | Baharaich   | 27.57    | 81.59     | 111      | 860.42           | 1895.95                 | 15.53           | 19.83  | 18329.17                   |
| 20    | Baheri      | 28.77    | 79.49     | 181      | 921.47           | 1767.35                 | 15.60           | 18.76  | 18216.67                   |
| 21    | Bairagnia   | 26.73    | 85.27     | 62       | 880.36           | 1753.00                 | 14.63           | 18.64  | 18985.00                   |
| 22    | Bairat      | 27.43    | 76.18     | 433      | 904.77           | 1892.20                 | 16.16           | 19.80  | 18530.00                   |
| 23    | Bakhtiarpur | 25.72    | 86.59     | 34       | 888.07           | 1684.35                 | 14.30           | 18.07  | 19157.50                   |
| 24    | Bali        | 25.19    | 73.28     | 296      | 895.62           | 2005.95                 | 16.71           | 20.75  | 19338.33                   |
| 25    | Balichak    | 22.36    | 87.55     | 16       | 876.48           | 2201.70                 | 18.73           | 19.32  | 17683.45                   |
| 26    | Balipara    | 26.82    | 92.77     | 70       | 947.00           | 1855.40                 | 16.24           | 19.50  | 18998.33                   |
| 27    | Ballabhgarh | 28.34    | 77.32     | 198      | 712.14           | 1404.35                 | 14.25           | 18.08  | 18071.00                   |
| 28    | Ballia      | 25.75    | 84.14     | 58       | 927.02           | 1851.65                 | 15.79           | 19.46  | 18893.33                   |
| 29    | Balotra     | 25.83    | 72.24     | 113      | 892.89           | 2157.85                 | 17.96           | 22.02  | 19135.83                   |
| 30    | Banda       | 25.28    | 80.22     | 25       | 922.71           | 1833.50                 | 15.60           | 19.31  | 19205.83                   |

|    |                |       |       |     |         |         |       |       |          |
|----|----------------|-------|-------|-----|---------|---------|-------|-------|----------|
| 31 | Bansdih        | 25.88 | 84.21 | 56  | 922.71  | 1833.50 | 15.60 | 19.31 | 19205.83 |
| 32 | Bansi          | 27.15 | 82.93 | 85  | 698.42  | 1354.85 | 14.51 | 18.30 | 18620.00 |
| 33 | Baran          | 25.10 | 76.51 | 270 | 909.42  | 1871.25 | 15.67 | 19.63 | 19226.67 |
| 34 | Bareilly       | 28.36 | 79.43 | 168 | 922.18  | 1772.15 | 15.58 | 18.80 | 18260.83 |
| 35 | Bareilly Sadar | 28.31 | 79.44 | 161 | 920.57  | 1763.20 | 15.51 | 18.73 | 18245.83 |
| 36 | Barh           | 25.47 | 85.70 | 34  | 865.63  | 1632.70 | 14.17 | 17.64 | 19123.33 |
| 37 | Barmer         | 25.75 | 71.41 | 167 | 858.89  | 1934.55 | 15.87 | 20.15 | 19228.33 |
| 38 | Baroda         | 22.30 | 73.18 | 43  | 888.83  | 1837.25 | 15.63 | 19.34 | 18557.50 |
| 39 | Barwasagar     | 25.37 | 78.74 | 224 | 840.64  | 1860.00 | 15.12 | 19.53 | 19259.17 |
| 40 | Basanti        | 22.20 | 88.71 | 6   | 883.93  | 1752.25 | 15.03 | 18.64 | 18710.83 |
| 41 | Baseri         | 26.74 | 77.53 | 200 | 845.21  | 1757.25 | 14.58 | 18.68 | 18821.67 |
| 42 | Basohli        | 32.50 | 75.81 | 552 | 599.96  | 1311.05 | 16.94 | 20.04 | 18893.90 |
| 43 | Basti          | 26.81 | 82.76 | 78  | 867.88  | 1803.85 | 14.91 | 19.07 | 18753.33 |
| 44 | Baswa          | 27.14 | 76.58 | 287 | 868.53  | 1863.65 | 15.43 | 19.56 | 18570.00 |
| 45 | Beawar         | 26.10 | 74.31 | 451 | 895.66  | 1862.90 | 15.76 | 19.56 | 18853.33 |
| 46 | Beri           | 28.70 | 76.58 | 223 | 840.36  | 1806.75 | 15.06 | 19.09 | 18460.83 |
| 47 | Bhadra         | 29.10 | 75.10 | 201 | 816.71  | 1911.10 | 15.62 | 19.96 | 18250.83 |
| 48 | Bhainsdehi     | 21.64 | 77.63 | 760 | 971.28  | 2097.45 | 18.48 | 21.51 | 18985.00 |
| 49 | Bhainswal      | 29.44 | 77.00 | 230 | 889.18  | 1676.40 | 14.61 | 18.00 | 17974.17 |
| 50 | Bharatpur      | 27.21 | 77.48 | 180 | 885.64  | 2039.40 | 17.63 | 21.32 | 19083.05 |
| 51 | Bharthana      | 26.75 | 79.21 | 148 | 837.77  | 1857.80 | 15.44 | 19.52 | 19184.17 |
| 52 | Bhilwara       | 25.32 | 74.58 | 424 | 875.44  | 1853.30 | 15.25 | 19.48 | 19352.50 |
| 53 | Bhivandi       | 19.25 | 73.09 | 9   | 488.89  | 1438.70 | 20.91 | 24.61 | 21782.86 |
| 54 | Bhognipur      | 26.20 | 79.81 | 121 | 678.24  | 1386.00 | 15.18 | 19.11 | 18816.30 |
| 55 | Biana          | 29.83 | 77.11 | 251 | 860.69  | 1812.05 | 15.10 | 19.13 | 18786.67 |
| 56 | Bidhuna        | 26.80 | 79.50 | 138 | 841.39  | 1724.75 | 14.09 | 18.41 | 18971.67 |
| 57 | Bilgram        | 27.11 | 80.02 | 133 | 734.79  | 1405.60 | 14.27 | 18.10 | 18674.00 |
| 58 | Bilhaur        | 26.84 | 80.06 | 119 | 839.44  | 1682.90 | 13.79 | 18.06 | 18970.00 |
| 59 | Bisauli        | 28.29 | 78.93 | 172 | 860.68  | 1673.90 | 14.07 | 17.98 | 18107.50 |
| 60 | Biswan         | 27.49 | 80.99 | 126 | 674.46  | 1435.80 | 14.50 | 18.40 | 18630.00 |
| 61 | Budaun         | 28.03 | 79.12 | 163 | 903.71  | 1750.55 | 14.83 | 18.62 | 18248.33 |
| 62 | Budhana        | 29.28 | 77.47 | 231 | 890.12  | 1777.70 | 15.43 | 18.85 | 17838.33 |
| 63 | Bulandshahr    | 28.40 | 77.84 | 198 | 855.11  | 1766.10 | 15.05 | 18.75 | 18160.83 |
| 64 | Bundi          | 25.43 | 75.64 | 267 | 903.28  | 1988.85 | 16.82 | 20.61 | 19204.17 |
| 65 | Chamarajnagar  | 11.93 | 76.94 | 695 | 1008.28 | 2091.55 | 18.75 | 21.46 | 19250.83 |
| 66 | Chandor        | 15.26 | 74.04 | 2   | 977.66  | 2045.60 | 18.14 | 21.08 | 19150.83 |
| 67 | Chapra         | 25.78 | 84.75 | 49  | 930.75  | 1931.85 | 16.59 | 20.13 | 19180.83 |

|     |               |       |       |     |         |         |       |       |          |
|-----|---------------|-------|-------|-----|---------|---------|-------|-------|----------|
| 68  | Charduar      | 26.52 | 92.47 | 87  | 945.72  | 1850.50 | 16.20 | 19.45 | 18970.00 |
| 69  | Chhibramau    | 27.15 | 79.50 | 138 | 873.40  | 1815.65 | 15.43 | 19.16 | 18486.67 |
| 70  | Chhotakosi    | 27.47 | 77.26 | 177 | 887.57  | 1763.95 | 15.14 | 18.73 | 18672.50 |
| 71  | Chickballapur | 13.43 | 77.73 | 920 | 990.64  | 2231.75 | 20.27 | 22.63 | 19060.83 |
| 72  | Chinatapalli  | 17.22 | 78.61 | 512 | 1021.32 | 1757.20 | 16.56 | 18.68 | 18440.83 |
| 73  | Chirawa       | 28.24 | 75.65 | 312 | 694.26  | 1573.55 | 15.50 | 19.78 | 18538.00 |
| 74  | Chomu         | 27.17 | 75.72 | 486 | 892.97  | 1827.30 | 15.56 | 19.26 | 18582.50 |
| 75  | Chunar        | 25.10 | 82.87 | 9   | 863.81  | 1777.90 | 14.73 | 18.85 | 19184.17 |
| 76  | Churu         | 28.29 | 74.96 | 282 | 695.00  | 1457.45 | 15.28 | 19.22 | 18701.04 |
| 77  | Dalmau        | 26.07 | 81.06 | 105 | 892.53  | 1840.50 | 15.36 | 19.37 | 19210.83 |
| 78  | Darbhanga     | 26.11 | 85.90 | 34  | 902.64  | 1893.60 | 16.03 | 19.81 | 18932.50 |
| 79  | Dataganj      | 28.03 | 79.41 | 149 | 907.23  | 1761.65 | 14.97 | 18.71 | 18236.67 |
| 80  | Dausa         | 26.89 | 76.34 | 345 | 874.71  | 1829.85 | 15.17 | 19.28 | 18864.17 |
| 81  | Dayanathpur   | 28.71 | 77.93 | 202 | 710.45  | 1403.65 | 14.22 | 18.08 | 18108.00 |
| 82  | Dehri         | 20.15 | 72.74 | 5   | 911.59  | 1891.65 | 16.13 | 19.80 | 19397.50 |
| 83  | Delhi Sadar   | 28.66 | 77.21 | 238 | 706.26  | 1365.00 | 14.01 | 17.83 | 17962.63 |
| 84  | Deoband       | 29.69 | 77.68 | 253 | 876.37  | 1766.65 | 15.12 | 18.76 | 17722.50 |
| 85  | Deogaon       | 25.74 | 82.99 | 72  | 871.87  | 1757.65 | 14.59 | 18.68 | 19265.00 |
| 86  | Deoria        | 26.49 | 83.78 | 67  | 774.58  | 1459.80 | 14.16 | 17.81 | 19077.36 |
| 87  | Derapur       | 26.49 | 83.78 | 67  | 675.94  | 1366.15 | 14.95 | 18.89 | 18788.04 |
| 88  | Desuri        | 25.28 | 73.57 | 384 | 894.32  | 1941.20 | 16.31 | 20.21 | 19367.50 |
| 89  | Dhamdaha      | 25.74 | 87.18 | 36  | 900.40  | 1904.65 | 16.08 | 19.91 | 19095.00 |
| 90  | Dhampur       | 29.31 | 78.51 | 235 | 823.67  | 1575.25 | 13.16 | 17.16 | 17745.00 |
| 91  | Dhandaus      | 27.06 | 79.17 | 151 | 602.09  | 1228.00 | 14.86 | 19.02 | 18626.83 |
| 92  | Dholpur       | 26.70 | 77.89 | 184 | 855.72  | 1817.55 | 15.12 | 19.18 | 18860.00 |
| 93  | Dhubri        | 26.02 | 89.97 | 22  | 915.65  | 1879.55 | 16.15 | 19.70 | 18722.50 |
| 94  | Didwana       | 27.40 | 74.58 | 352 | 581.07  | 1184.00 | 14.05 | 18.49 | 18426.83 |
| 95  | Digri         | 26.56 | 70.94 | 253 | 813.36  | 1719.50 | 15.95 | 19.67 | 19297.27 |
| 96  | Doomni        | 26.72 | 91.31 | 66  | 826.29  | 1593.85 | 16.32 | 19.36 | 17596.15 |
| 97  | Dubari        | 26.21 | 83.73 | 58  | 826.29  | 1593.85 | 16.32 | 19.36 | 17596.15 |
| 98  | Etah          | 27.56 | 78.66 | 165 | 872.00  | 1707.25 | 14.46 | 18.26 | 18746.67 |
| 99  | Etawah        | 26.81 | 79.00 | 135 | 859.51  | 1825.45 | 15.20 | 19.25 | 18795.83 |
| 100 | Faizabad      | 26.77 | 82.14 | 96  | 881.72  | 1763.45 | 14.81 | 18.73 | 18904.17 |
| 101 | Falakata      | 26.52 | 89.20 | 48  | 905.29  | 1899.95 | 16.17 | 19.87 | 18881.67 |
| 102 | Faridpur      | 28.21 | 79.54 | 164 | 919.81  | 1764.60 | 15.51 | 18.74 | 18285.83 |
| 103 | Farrukhabad   | 27.38 | 79.59 | 145 | 838.02  | 1731.85 | 14.20 | 18.47 | 18656.67 |
| 104 | Farrukhanagar | 28.45 | 76.82 | 220 | 842.69  | 1677.95 | 13.99 | 18.02 | 18080.83 |

|     |                |       |       |     |        |         |       |       |          |
|-----|----------------|-------|-------|-----|--------|---------|-------|-------|----------|
| 105 | Fatehabad      | 29.51 | 75.45 | 202 | 821.30 | 1891.15 | 15.52 | 19.79 | 18149.17 |
| 106 | Fatehgarh      | 27.37 | 79.62 | 138 | 853.29 | 1857.95 | 15.21 | 19.52 | 18765.00 |
| 107 | Fatehgarha     | 27.22 | 79.38 | 156 | 841.20 | 1734.00 | 14.24 | 18.48 | 18651.67 |
| 108 | Fatehpur       | 25.92 | 80.81 | 112 | 882.67 | 1720.15 | 14.31 | 18.37 | 18760.00 |
| 109 | Fatehpur Sikri | 27.09 | 77.67 | 180 | 882.12 | 1768.85 | 15.10 | 18.77 | 18806.67 |
| 110 | Fatehpura      | 24.61 | 73.69 | 576 | 907.31 | 1863.95 | 15.70 | 19.57 | 18969.17 |
| 111 | Firozabad      | 27.16 | 78.40 | 160 | 878.31 | 1702.55 | 14.58 | 18.22 | 18787.50 |
| 112 | Firozpur       | 30.93 | 74.62 | 188 | 863.46 | 1861.75 | 15.35 | 19.55 | 18603.33 |
| 113 | Gangapur       | 19.70 | 75.01 | 477 | 874.83 | 1771.10 | 14.71 | 18.79 | 19359.17 |
| 114 | Gangapura      | 27.96 | 81.78 | 118 | 888.38 | 1870.60 | 15.61 | 19.62 | 19036.67 |
| 115 | Gangapuraa     | 25.13 | 74.15 | 496 | 869.56 | 1837.05 | 15.13 | 19.34 | 19372.50 |
| 116 | Gangarampur    | 25.40 | 88.53 | 24  | 944.14 | 1981.85 | 16.92 | 20.55 | 19307.50 |
| 117 | Gauhati        | 26.14 | 91.74 | 43  | 944.54 | 1876.55 | 16.21 | 19.67 | 19286.67 |
| 118 | Ghatampur      | 26.15 | 80.17 | 124 | 885.61 | 1838.60 | 15.43 | 19.36 | 19066.67 |
| 119 | Ghaziabad      | 28.67 | 77.45 | 216 | 862.13 | 1685.35 | 14.21 | 18.08 | 17905.00 |
| 120 | Ghazipur       | 25.58 | 83.58 | 64  | 881.11 | 1800.85 | 15.17 | 19.04 | 19149.17 |
| 121 | Ghosi          | 26.12 | 83.54 | 64  | 879.27 | 1812.35 | 14.93 | 19.14 | 19211.67 |
| 122 | Girwan         | 25.31 | 80.39 | 162 | 871.50 | 1825.00 | 15.15 | 19.24 | 19325.00 |
| 123 | Goalpara       | 26.16 | 90.63 | 43  | 962.00 | 1960.50 | 17.02 | 20.37 | 19081.67 |
| 124 | Gohana         | 29.14 | 76.69 | 226 | 874.51 | 1948.95 | 16.52 | 20.27 | 17980.00 |
| 125 | Golaghat       | 26.52 | 93.96 | 82  | 961.28 | 1827.25 | 15.97 | 19.26 | 18775.00 |
| 126 | Gonda          | 27.13 | 81.96 | 109 | 680.37 | 1820.60 | 17.91 | 22.07 | 18007.92 |
| 127 | Gopalpura      | 26.88 | 75.78 | 407 | 894.26 | 1736.20 | 14.99 | 18.50 | 18357.50 |
| 128 | Gorakhpur      | 26.76 | 83.37 | 70  | 883.08 | 1850.60 | 15.42 | 19.46 | 18765.00 |
| 129 | Gunnaur        | 28.24 | 78.44 | 172 | 710.70 | 1398.10 | 14.26 | 18.16 | 18057.58 |
| 130 | Gurgaon        | 28.46 | 77.03 | 226 | 710.41 | 1376.60 | 14.01 | 17.81 | 18010.00 |
| 131 | Hamirpura      | 22.07 | 74.09 | 226 | 846.09 | 1858.95 | 15.17 | 19.52 | 19180.83 |
| 132 | Handia         | 25.36 | 82.19 | 86  | 883.91 | 1749.45 | 14.60 | 18.61 | 19215.00 |
| 133 | Hansi          | 29.10 | 75.96 | 210 | 819.63 | 1916.95 | 15.71 | 20.01 | 18264.17 |
| 134 | Hanumangarh    | 29.61 | 74.29 | 174 | 577.11 | 1334.40 | 16.56 | 20.52 | 18460.49 |
| 135 | Hapur          | 28.73 | 77.78 | 214 | 861.22 | 1683.35 | 14.18 | 18.06 | 17900.00 |
| 136 | Haraiya        | 26.07 | 83.17 | 58  | 911.41 | 1820.80 | 15.24 | 19.21 | 19023.33 |
| 137 | Hardoi         | 27.40 | 80.13 | 141 | 698.16 | 1749.40 | 16.91 | 21.19 | 18382.35 |
| 138 | Hasanganj      | 26.87 | 80.94 | 110 | 886.21 | 1825.90 | 15.32 | 19.25 | 18914.17 |
| 139 | Hasanpur       | 28.72 | 78.28 | 205 | 886.21 | 1825.90 | 15.32 | 19.25 | 18914.17 |
| 140 | Hasanpura      | 26.92 | 75.77 | 426 | 884.74 | 1748.50 | 14.60 | 18.60 | 19270.00 |
| 141 | Hassan         | 13.01 | 76.10 | 944 | 739.28 | 1736.75 | 21.21 | 23.34 | 19114.44 |

|     |                  |       |       |      |        |         |       |       |          |
|-----|------------------|-------|-------|------|--------|---------|-------|-------|----------|
| 142 | Hassanpur        | 29.06 | 77.07 | 222  | 890.70 | 1814.35 | 15.55 | 19.15 | 18345.83 |
| 143 | Hata             | 26.74 | 83.74 | 73   | 888.86 | 1679.65 | 14.17 | 18.03 | 19039.17 |
| 144 | Hathras          | 27.61 | 78.05 | 183  | 884.60 | 1751.05 | 15.00 | 18.63 | 18699.17 |
| 145 | Hattin           | 28.04 | 77.23 | 189  | 710.45 | 1396.85 | 14.15 | 18.01 | 18117.00 |
| 146 | Hindaun          | 26.75 | 77.03 | 227  | 898.32 | 1874.05 | 15.80 | 19.65 | 19135.83 |
| 147 | Hindoli          | 25.57 | 75.50 | 294  | 920.64 | 2052.35 | 17.74 | 21.14 | 19044.17 |
| 148 | Hissar           | 29.15 | 75.72 | 203  | 822.16 | 1913.75 | 15.70 | 19.98 | 18242.50 |
| 149 | Iglas            | 27.71 | 77.94 | 178  | 887.24 | 1752.65 | 15.05 | 18.64 | 18686.67 |
| 150 | Indaagarh        | 25.43 | 76.12 | 248  | 906.19 | 1871.45 | 15.67 | 19.63 | 18994.17 |
| 151 | Isarda           | 26.17 | 76.03 | 276  | 894.14 | 1919.55 | 16.09 | 20.03 | 19254.17 |
| 152 | Itawah           | 26.81 | 79.00 | 135  | 904.45 | 1895.00 | 15.83 | 19.83 | 19045.00 |
| 153 | Jagadhari        | 30.17 | 77.30 | 283  | 871.78 | 1698.75 | 14.62 | 18.19 | 17550.83 |
| 154 | Jaipura          | 30.78 | 76.03 | 251  | 853.44 | 1911.00 | 16.06 | 19.96 | 19334.17 |
| 155 | Jaisalmer        | 26.92 | 70.91 | 237  | 872.61 | 1941.55 | 16.33 | 20.21 | 18838.33 |
| 156 | Jaitram          | 26.12 | 73.57 | 297  | 879.02 | 1872.80 | 15.29 | 19.64 | 18990.83 |
| 157 | Jalalabad        | 27.72 | 79.66 | 138  | 875.09 | 1749.10 | 14.44 | 18.61 | 18647.50 |
| 158 | Jalalpur         | 25.86 | 79.81 | 119  | 925.95 | 1796.90 | 15.60 | 19.01 | 18786.67 |
| 159 | Jalaun           | 26.15 | 79.33 | 137  | 674.44 | 1376.35 | 15.02 | 19.00 | 18870.65 |
| 160 | Jalesar          | 27.47 | 78.31 | 164  | 870.57 | 1699.30 | 14.40 | 18.19 | 18750.00 |
| 161 | Jalpaiguri       | 26.54 | 88.72 | 75   | 910.17 | 1954.90 | 16.62 | 20.32 | 18825.00 |
| 162 | Jamwa<br>Ramgarh | 27.02 | 76.00 | 407  | 592.90 | 1129.80 | 13.78 | 17.83 | 18580.49 |
| 163 | Jarauda          | 28.89 | 78.01 | 215  | 887.08 | 1729.15 | 15.03 | 18.44 | 17749.17 |
| 164 | Jatusana         | 28.33 | 76.54 | 236  | 721.50 | 1511.90 | 15.81 | 19.47 | 18736.73 |
| 165 | Jaunpur          | 25.75 | 82.70 | 75   | 880.76 | 1742.20 | 14.54 | 18.55 | 19049.17 |
| 166 | Jawaja           | 26.07 | 74.31 | 454  | 894.49 | 1768.05 | 14.99 | 18.77 | 19231.67 |
| 167 | Jhunjhunu        | 28.13 | 75.40 | 331  | 587.34 | 1219.10 | 14.49 | 18.92 | 18092.68 |
| 168 | Jiwanpur         | 30.41 | 73.95 | 170  | 878.00 | 1802.75 | 14.85 | 19.06 | 19205.00 |
| 169 | Jodhpur          | 26.24 | 73.02 | 213  | 870.71 | 2044.35 | 17.07 | 21.07 | 18979.17 |
| 170 | Jowai            | 25.45 | 92.21 | 1359 | 894.03 | 2051.55 | 18.67 | 22.03 | 19123.68 |
| 171 | Jowari           | 25.26 | 92.12 | 139  | 894.03 | 2051.55 | 18.67 | 22.03 | 19123.68 |
| 172 | Kachugaon        | 26.54 | 93.98 | 88   | 928.47 | 1940.95 | 16.79 | 20.21 | 19086.67 |
| 173 | Kaimganj         | 27.55 | 79.33 | 147  | 604.61 | 1229.30 | 14.90 | 19.04 | 18509.76 |
| 174 | Kairana          | 29.39 | 77.20 | 233  | 899.39 | 1774.80 | 15.43 | 18.82 | 17815.00 |
| 175 | Kaithal          | 29.79 | 76.40 | 234  | 831.18 | 1828.60 | 15.14 | 19.27 | 18060.00 |
| 176 | Kalchini         | 26.69 | 89.45 | 107  | 886.92 | 1933.65 | 17.06 | 20.56 | 18564.96 |
| 177 | Kalpi            | 26.12 | 79.75 | 108  | 679.88 | 1384.30 | 15.19 | 19.09 | 18821.74 |

|     |             |       |       |     |        |         |       |       |          |
|-----|-------------|-------|-------|-----|--------|---------|-------|-------|----------|
| 178 | Kamasin     | 25.51 | 80.91 | 100 | 913.08 | 1904.80 | 16.05 | 19.91 | 19060.00 |
| 179 | Kamen       | 27.39 | 77.16 | 183 | 887.57 | 1821.70 | 15.59 | 19.21 | 18401.67 |
| 180 | Kannauj     | 27.05 | 79.91 | 124 | 832.51 | 1641.25 | 13.59 | 17.71 | 18486.67 |
| 181 | Kanpur      | 26.45 | 80.33 | 128 | 837.05 | 1646.80 | 13.60 | 17.76 | 19008.33 |
| 182 | karauli     | 26.49 | 77.02 | 275 | 821.57 | 1685.55 | 13.72 | 18.08 | 19098.33 |
| 183 | Karchana    | 25.28 | 81.95 | 88  | 873.16 | 1835.30 | 15.24 | 19.33 | 19096.67 |
| 184 | Kasganj     | 27.81 | 78.65 | 173 | 614.17 | 1249.10 | 15.60 | 19.47 | 18701.23 |
| 185 | Kashipur    | 29.21 | 78.96 | 232 | 908.03 | 1810.30 | 15.74 | 19.12 | 17872.50 |
| 186 | Kekri       | 25.97 | 75.15 | 355 | 907.64 | 1844.30 | 15.51 | 19.40 | 19025.83 |
| 187 | Kerakat     | 25.64 | 82.92 | 73  | 872.77 | 1760.30 | 14.61 | 18.70 | 19288.33 |
| 188 | Khaga       | 25.77 | 81.10 | 102 | 881.12 | 1733.60 | 14.48 | 18.48 | 19038.33 |
| 189 | Khair       | 27.94 | 77.84 | 186 | 872.62 | 1686.25 | 14.37 | 18.09 | 18668.33 |
| 190 | Khairagarha | 26.56 | 77.48 | 192 | 853.12 | 1787.05 | 14.87 | 18.93 | 18803.33 |
| 191 | Khajwa      | 24.92 | 79.93 | 200 | 880.47 | 1781.70 | 14.70 | 18.88 | 19196.67 |
| 192 | Khalilabad  | 26.78 | 83.07 | 71  | 901.28 | 1735.15 | 14.70 | 18.49 | 18878.33 |
| 193 | Khamera     | 23.79 | 74.46 | 233 | 956.45 | 2098.85 | 18.50 | 21.52 | 18630.00 |
| 194 | Khandar     | 27.21 | 77.98 | 171 | 866.81 | 1788.40 | 14.71 | 18.94 | 19250.00 |
| 195 | Khatima     | 28.92 | 79.97 | 207 | 893.85 | 1688.10 | 14.59 | 18.10 | 17945.83 |
| 196 | Kheri       | 28.17 | 80.63 | 137 | 853.92 | 1733.55 | 14.48 | 18.48 | 18250.00 |
| 197 | Khetri      | 28.00 | 75.79 | 393 | 571.49 | 1123.95 | 13.36 | 17.76 | 18126.83 |
| 198 | Khol        | 28.20 | 76.40 | 288 | 800.81 | 1611.80 | 14.85 | 18.69 | 18837.27 |
| 199 | Khutar      | 28.21 | 80.27 | 157 | 877.49 | 1697.00 | 14.55 | 18.18 | 18215.83 |
| 200 | Kishangarh  | 26.59 | 74.86 | 452 | 878.99 | 1936.85 | 16.32 | 20.17 | 18485.00 |
| 201 | Kotah       | 25.21 | 75.86 | 259 | 910.41 | 1998.35 | 16.97 | 20.69 | 19237.50 |
| 202 | Kotkasim    | 28.03 | 76.72 | 259 | 888.45 | 1832.40 | 15.68 | 19.30 | 18245.83 |
| 203 | Kotputli    | 27.70 | 76.20 | 363 | 899.29 | 1872.65 | 15.97 | 19.64 | 18737.50 |
| 204 | Kuakhera    | 29.66 | 77.38 | 248 | 879.08 | 1643.35 | 14.33 | 17.73 | 18012.50 |
| 205 | Kumargram   | 26.61 | 89.83 | 65  | 909.42 | 1850.00 | 15.59 | 19.45 | 18916.67 |
| 206 | Kunch       | 26.00 | 79.16 | 146 | 668.61 | 1347.60 | 14.62 | 18.69 | 19064.13 |
| 207 | Kunda       | 25.72 | 81.52 | 94  | 887.13 | 1731.35 | 14.54 | 18.46 | 19029.17 |
| 208 | Kundhra     | 28.42 | 79.40 | 184 | 923.11 | 1766.10 | 15.56 | 18.75 | 18165.83 |
| 209 | Kurtha      | 25.13 | 84.81 | 69  | 923.70 | 1864.65 | 15.91 | 19.57 | 19069.17 |
| 210 | Lalsot      | 26.56 | 76.33 | 310 | 875.05 | 1743.25 | 14.52 | 18.56 | 19030.00 |
| 211 | Lathi       | 21.73 | 71.39 | 122 | 812.57 | 1474.30 | 12.72 | 16.32 | 18244.17 |
| 212 | Lucknow     | 26.85 | 80.95 | 112 | 888.21 | 1787.80 | 14.79 | 18.93 | 19023.33 |
| 213 | Lumding     | 25.75 | 93.17 | 125 | 899.15 | 1920.35 | 16.46 | 20.04 | 19348.33 |
| 214 | Lunkaransar | 28.50 | 73.75 | 193 | 617.27 | 1371.65 | 15.13 | 19.46 | 18084.27 |

|     |              |       |       |     |        |         |       |       |          |
|-----|--------------|-------|-------|-----|--------|---------|-------|-------|----------|
| 215 | Machhlisahr  | 25.69 | 82.41 | 85  | 867.58 | 1759.95 | 14.58 | 18.70 | 19259.17 |
| 216 | Madhwapur    | 25.44 | 81.86 | 94  | 872.77 | 1798.95 | 15.18 | 19.02 | 19015.00 |
| 217 | Magarwara    | 26.50 | 80.43 | 118 | 837.04 | 1838.30 | 14.92 | 19.35 | 19267.50 |
| 218 | Maharajganj  | 27.14 | 83.56 | 83  | 865.28 | 1789.50 | 14.80 | 18.95 | 19040.83 |
| 219 | Mahua        | 25.81 | 81.39 | 36  | 913.06 | 1903.15 | 16.36 | 19.89 | 19287.50 |
| 220 | Mahul        | 19.03 | 72.89 | 10  | 873.71 | 1769.30 | 14.69 | 18.78 | 19021.67 |
| 221 | Mahwa        | 27.03 | 76.92 | 225 | 900.76 | 1950.60 | 16.59 | 20.29 | 18938.33 |
| 222 | Maibong      | 25.26 | 93.14 | 505 | 863.41 | 1718.15 | 14.79 | 18.47 | 18700.84 |
| 223 | Mainpuri     | 27.22 | 79.02 | 224 | 838.29 | 1624.90 | 13.48 | 17.57 | 18300.00 |
| 224 | Malpura      | 26.30 | 75.36 | 326 | 876.73 | 1841.75 | 15.29 | 19.38 | 18885.00 |
| 225 | Manatu       | 24.23 | 84.40 | 331 | 838.71 | 1949.10 | 16.16 | 20.28 | 18792.50 |
| 226 | Mandawar     | 27.15 | 76.85 | 234 | 879.15 | 1941.70 | 16.35 | 20.21 | 18475.83 |
| 227 | Mangrol      | 25.33 | 76.51 | 226 | 903.86 | 1942.30 | 16.15 | 20.22 | 19424.17 |
| 228 | Manjhanpur   | 25.52 | 81.37 | 105 | 908.70 | 1718.10 | 14.90 | 18.35 | 19187.50 |
| 229 | Mankapur     | 27.03 | 88.21 | 92  | 896.82 | 1780.05 | 14.86 | 18.87 | 18737.50 |
| 230 | Marhaura     | 25.96 | 84.86 | 47  | 880.58 | 1653.55 | 14.00 | 17.81 | 19138.33 |
| 231 | Mariahu      | 25.60 | 82.58 | 70  | 867.26 | 1748.30 | 14.48 | 18.60 | 19315.83 |
| 232 | Mathabhango  | 26.34 | 89.21 | 52  | 944.04 | 1921.35 | 16.35 | 20.04 | 18905.00 |
| 233 | Mathura      | 27.49 | 77.67 | 180 | 886.72 | 1752.65 | 15.03 | 18.64 | 18731.67 |
| 234 | Mauganj      | 24.66 | 81.88 | 345 | 676.14 | 1780.00 | 17.49 | 21.84 | 18889.00 |
| 235 | Mauhaha      | 25.41 | 80.07 | 200 | 831.16 | 1751.60 | 14.23 | 18.63 | 19325.83 |
| 236 | Mawana       | 29.09 | 77.92 | 225 | 876.45 | 1696.05 | 14.21 | 18.17 | 17840.83 |
| 237 | Meerut       | 28.98 | 77.7  | 225 | 873.84 | 1648.85 | 14.21 | 17.77 | 18085.83 |
| 238 | Meja         | 25.14 | 81.98 | 86  | 864.29 | 1712.35 | 14.30 | 18.30 | 19313.33 |
| 239 | Mekliganj    | 26.34 | 88.91 | 57  | 919.17 | 1838.90 | 15.68 | 19.36 | 19085.00 |
| 240 | Mertacity    | 26.64 | 74.03 | 312 | 892.72 | 1887.95 | 15.92 | 19.77 | 19078.33 |
| 241 | Mirzapur     | 25.12 | 82.56 | 79  | 863.96 | 1779.60 | 14.74 | 18.86 | 19174.17 |
| 242 | Misrikh      | 27.42 | 80.52 | 138 | 866.07 | 1740.00 | 14.49 | 18.53 | 18459.17 |
| 243 | Mohanlalganj | 26.68 | 80.98 | 102 | 859.59 | 1760.20 | 14.53 | 18.70 | 18967.50 |
| 244 | Moradabad    | 28.83 | 78.77 | 193 | 872.09 | 1735.75 | 14.94 | 18.50 | 18148.33 |
| 245 | Moth         | 25.72 | 78.95 | 169 | 872.59 | 1934.05 | 15.99 | 20.15 | 19324.17 |
| 246 | Motihari     | 26.64 | 84.9  | 58  | 863.83 | 1727.70 | 14.24 | 18.43 | 19048.33 |
| 247 | Moyna        | 22.27 | 87.76 | 5   | 647.04 | 2637.90 | 22.73 | 26.02 | 19283.33 |
| 248 | Mozamabad    | 26.67 | 75.36 | 334 | 869.24 | 1892.35 | 15.79 | 19.80 | 19005.83 |
| 249 | Muhamdi      | 27.95 | 80.2  | 150 | 889.55 | 1762.25 | 14.95 | 18.72 | 18355.83 |
| 250 | Mungaoli     | 24.41 | 78.09 | 408 | 901.45 | 1859.65 | 15.58 | 18.03 | 18417.69 |
| 251 | Musafirkhana | 26.37 | 81.8  | 97  | 684.02 | 1349.35 | 14.94 | 18.71 | 18706.52 |

|     |             |       |       |      |         |         |       |       |          |
|-----|-------------|-------|-------|------|---------|---------|-------|-------|----------|
| 252 | Nagore      | 27.19 | 73.74 | 304  | 793.36  | 1752.70 | 16.23 | 20.12 | 19247.71 |
| 253 | Najafgarh   | 28.6  | 76.98 | 217  | 874.25  | 1709.30 | 14.60 | 18.28 | 18349.17 |
| 254 | Najibabad   | 29.61 | 78.34 | 264  | 892.66  | 1678.50 | 14.45 | 18.02 | 17725.83 |
| 255 | Nangloi     | 28.68 | 77.06 | 218  | 712.09  | 1392.80 | 14.18 | 17.97 | 17984.00 |
| 256 | Nanpara     | 27.86 | 81.49 | 123  | 907.00  | 1771.95 | 14.93 | 18.80 | 18507.50 |
| 257 | Naraina     | 28.63 | 77.13 | 224  | 841.56  | 1743.95 | 14.36 | 18.57 | 18975.00 |
| 258 | Narela      | 28.85 | 77.09 | 223  | 711.21  | 1393.45 | 14.17 | 17.97 | 17943.00 |
| 259 | Nawa        | 27.02 | 75    | 384  | 605.14  | 1303.10 | 14.68 | 18.36 | 18289.01 |
| 260 | Nawabganj   | 28.54 | 79.63 | 172  | 919.54  | 1760.90 | 15.48 | 18.71 | 18210.00 |
| 261 | Nawanshahr  | 31.09 | 76.03 | 239  | 746.92  | 1678.55 | 16.04 | 19.72 | 17758.88 |
| 262 | Neemkathana | 27.73 | 75.78 | 448  | 872.18  | 1828.65 | 15.31 | 19.27 | 18430.83 |
| 263 | New Delhi   | 28.61 | 77.2  | 205  | 873.42  | 1673.00 | 14.43 | 17.98 | 18383.33 |
| 264 | Nighasan    | 28.23 | 80.87 | 135  | 884.28  | 1676.50 | 14.18 | 18.00 | 18107.50 |
| 265 | Niwari      | 28.87 | 77.53 | 218  | 887.04  | 1859.80 | 15.53 | 19.53 | 18935.00 |
| 266 | Nohar       | 29.17 | 74.76 | 183  | 820.63  | 1806.50 | 14.86 | 19.09 | 17890.83 |
| 267 | Nokh        | 27.55 | 73.47 | 320  | 851.95  | 1849.05 | 15.29 | 19.44 | 18511.67 |
| 268 | Nurpur      | 32.3  | 75.88 | 572  | 590.04  | 1221.95 | 15.74 | 18.95 | 18819.51 |
| 269 | Orai        | 26    | 79.44 | 127  | 847.13  | 1806.75 | 14.87 | 19.09 | 19334.17 |
| 270 | Pachpadra   | 25.92 | 72.25 | 106  | 758.39  | 1890.65 | 18.00 | 22.22 | 19061.54 |
| 271 | Padampur    | 29.7  | 73.62 | 164  | 578.11  | 1319.45 | 16.44 | 20.34 | 18407.41 |
| 272 | Padrauna    | 26.89 | 83.97 | 75   | 850.27  | 1687.65 | 14.16 | 18.10 | 18852.50 |
| 273 | Pailani     | 25.76 | 80.42 | 105  | 856.35  | 1835.60 | 15.03 | 19.33 | 19158.33 |
| 274 | Palana      | 27.84 | 73.26 | 268  | 688.27  | 1568.55 | 15.54 | 19.73 | 18815.00 |
| 275 | Pali        | 25.77 | 73.32 | 214  | 912.70  | 2039.25 | 16.97 | 21.03 | 19098.33 |
| 276 | Palitana    | 21.53 | 71.82 | 57   | 1000.73 | 2016.65 | 17.97 | 20.84 | 19039.17 |
| 277 | Palwal      | 28.14 | 77.33 | 196  | 713.88  | 1399.25 | 14.18 | 18.03 | 18090.00 |
| 278 | Panchgani   | 17.92 | 73.79 | 1262 | 1047.11 | 1787.75 | 17.02 | 18.93 | 18494.17 |
| 279 | Panipat     | 29.39 | 76.96 | 243  | 714.30  | 1550.75 | 15.59 | 19.55 | 18138.00 |
| 280 | Parbatsar   | 26.88 | 74.76 | 428  | 886.21  | 1847.00 | 15.64 | 19.43 | 18695.00 |
| 281 | Pariat      | 23.23 | 80.13 | 431  | 809.55  | 2027.10 | 20.82 | 23.53 | 19341.35 |
| 282 | Parlakimedi | 18.77 | 84.09 | 74   | 809.55  | 2027.10 | 20.82 | 23.53 | 19341.35 |
| 283 | Patan       | 17.37 | 73.89 | 576  | 911.25  | 1988.70 | 16.87 | 20.61 | 19201.67 |
| 284 | Patna       | 25.59 | 85.13 | 46   | 856.16  | 1754.55 | 16.03 | 19.56 | 19241.59 |
| 285 | Patti       | 25.91 | 82.19 | 85   | 874.93  | 1773.35 | 14.75 | 18.81 | 19280.83 |
| 286 | Pauta       | 29.18 | 78.47 | 219  | 925.89  | 1787.20 | 15.73 | 18.93 | 18158.33 |
| 287 | Pawata      | 27.35 | 74.65 | 355  | 899.65  | 1833.50 | 15.69 | 19.31 | 19163.33 |
| 288 | Pawayan     | 27.08 | 80.68 | 128  | 883.69  | 1600.45 | 13.78 | 17.37 | 18043.33 |



|     |                 |       |       |     |         |         |       |       |          |
|-----|-----------------|-------|-------|-----|---------|---------|-------|-------|----------|
| 289 | Phalodi         | 26.72 | 73.92 | 320 | 597.09  | 1237.35 | 14.86 | 19.14 | 18490.24 |
| 290 | Pharenda        | 27.1  | 83.27 | 77  | 873.35  | 1772.70 | 14.67 | 18.81 | 18750.00 |
| 291 | Phulpur         | 25.55 | 82.08 | 88  | 875.60  | 1771.50 | 14.74 | 18.80 | 19351.67 |
| 292 | pilibhit City   | 28.62 | 79.81 | 176 | 926.09  | 1773.95 | 15.66 | 18.82 | 18263.33 |
| 293 | Pisangan        | 26.39 | 74.37 | 392 | 891.12  | 1810.25 | 15.32 | 19.12 | 19093.33 |
| 294 | Pratapgarh      | 25.89 | 81.94 | 88  | 909.24  | 1836.75 | 15.51 | 19.34 | 19255.00 |
| 295 | Punahana        | 27.86 | 77.2  | 192 | 891.65  | 1818.25 | 15.60 | 19.19 | 18356.67 |
| 296 | Pupri           | 26.46 | 85.69 | 43  | 873.05  | 1799.85 | 15.19 | 19.03 | 19045.83 |
| 297 | Puranpur        | 28.51 | 80.14 | 181 | 921.45  | 1694.85 | 14.55 | 18.16 | 18256.67 |
| 298 | Purwa           | 26.45 | 80.77 | 113 | 888.13  | 1834.35 | 15.39 | 19.32 | 18987.50 |
| 299 | Raebareli       | 26.23 | 81.24 | 108 | 892.26  | 1828.50 | 15.23 | 19.27 | 19155.83 |
| 300 | Raghapur        | 25.53 | 85.38 | 37  | 892.87  | 1856.60 | 15.81 | 19.51 | 19326.67 |
| 301 | Raisingnagar    | 29.53 | 73.44 | 160 | 580.60  | 1333.75 | 16.68 | 20.52 | 18443.21 |
| 302 | Rajaund         | 29.57 | 76.48 | 228 | 831.84  | 1846.20 | 15.27 | 19.42 | 18114.17 |
| 303 | Rajgarh1        | 28.71 | 76.09 | 210 | 859.47  | 1996.80 | 16.71 | 20.67 | 18248.33 |
| 304 | Ramban          | 26.51 | 85.09 | 51  | 738.31  | 1429.00 | 14.65 | 17.39 | 17972.90 |
| 305 | Ramgarh         | 23.63 | 85.51 | 323 | 881.89  | 1853.80 | 15.31 | 19.48 | 18391.67 |
| 306 | Ramgiri         | 17.05 | 79.27 | 223 | 1005.70 | 1794.40 | 16.19 | 18.99 | 18646.67 |
| 307 | Ramnagar1       | 27.1  | 84.19 | 87  | 911.80  | 1747.35 | 14.76 | 18.59 | 18474.17 |
| 308 | Ramnagar3       | 32.48 | 75.19 | 792 | 606.78  | 1253.70 | 16.44 | 19.34 | 19029.27 |
| 309 | Rangiya         | 26.43 | 91.62 | 44  | 954.87  | 1931.00 | 16.74 | 20.13 | 19257.50 |
| 310 | Ratangarh       | 28.06 | 74.61 | 305 | 576.28  | 1175.40 | 13.93 | 18.38 | 18073.17 |
| 311 | Rath            | 25.6  | 79.56 | 146 | 847.82  | 1835.65 | 15.00 | 19.33 | 19350.00 |
| 312 | Rewari          | 28.19 | 76.62 | 236 | 723.12  | 1495.20 | 15.66 | 19.30 | 18765.31 |
| 313 | Rohtak          | 28.89 | 76.6  | 224 | 803.35  | 1733.80 | 16.07 | 19.80 | 18686.36 |
| 314 | Roorkee         | 29.85 | 77.88 | 272 | 865.32  | 1674.55 | 14.37 | 17.99 | 17658.33 |
| 315 | Rudrapur        | 28.98 | 79.41 | 197 | 887.59  | 1623.90 | 14.11 | 17.57 | 17820.83 |
| 316 | Sabour          | 25.24 | 87.04 | 35  | 896.14  | 1901.90 | 16.03 | 19.88 | 19297.50 |
| 317 | Sadabad         | 27.43 | 78.03 | 176 | 881.13  | 1748.95 | 14.96 | 18.61 | 18726.67 |
| 318 | Safipur         | 26.73 | 80.34 | 124 | 592.13  | 1140.60 | 13.99 | 17.96 | 18690.24 |
| 319 | Saharanpur      | 29.96 | 77.55 | 281 | 877.32  | 1622.70 | 14.17 | 17.56 | 17948.33 |
| 320 | Sahaswan        | 28.07 | 78.75 | 164 | 852.88  | 1689.50 | 14.11 | 18.11 | 18160.83 |
| 321 | Saidpur Bhitari | 25.55 | 83.25 | 67  | 877.27  | 1768.80 | 14.72 | 18.77 | 19310.00 |
| 322 | Salimpur        | 25.61 | 85.14 | 49  | 770.70  | 1454.55 | 13.85 | 17.63 | 18922.43 |
| 323 | Salon           | 26.03 | 81.45 | 93  | 860.55  | 1787.50 | 14.86 | 18.93 | 19110.00 |
| 324 | Sambhal         | 28.59 | 78.57 | 195 | 714.49  | 1377.00 | 14.06 | 17.81 | 17990.00 |
| 325 | Sambhar         | 26.9  | 75.18 | 364 | 841.59  | 1751.15 | 14.40 | 18.63 | 18944.17 |

|     |                   |       |       |      |        |         |       |       |          |
|-----|-------------------|-------|-------|------|--------|---------|-------|-------|----------|
| 326 | Samodh            | 24.38 | 84.51 | 203  | 768.37 | 1614.20 | 15.11 | 18.98 | 18820.37 |
| 327 | Sampla            | 28.77 | 76.77 | 217  | 849.19 | 1711.45 | 14.28 | 18.30 | 18024.17 |
| 328 | Sandila           | 27.07 | 80.51 | 132  | 840.91 | 1671.10 | 14.02 | 17.96 | 18695.83 |
| 329 | Sanehighar        | 26.79 | 81.54 | 99   | 886.23 | 1828.80 | 15.34 | 19.27 | 19035.00 |
| 330 | Sanganer          | 26.82 | 75.77 | 386  | 886.23 | 1828.80 | 15.34 | 19.27 | 19035.00 |
| 331 | Sapotra           | 26.29 | 76.74 | 252  | 870.27 | 1792.55 | 14.88 | 18.97 | 18961.67 |
| 332 | Saraon            | 25.03 | 84.26 | 87   | 907.99 | 1842.65 | 15.54 | 19.39 | 19325.83 |
| 333 | Sardarshahr       | 28.43 | 74.49 | 253  | 676.09 | 1534.65 | 15.48 | 19.70 | 18498.98 |
| 334 | Sardhana          | 29.14 | 77.61 | 227  | 868.41 | 1631.90 | 14.08 | 17.63 | 18061.67 |
| 335 | Sarila            | 25.77 | 79.67 | 131  | 855.38 | 1811.75 | 14.78 | 19.13 | 19353.33 |
| 336 | Sawai<br>Madhopur | 26.03 | 76.35 | 255  | 868.74 | 1855.55 | 15.25 | 19.50 | 19310.83 |
| 337 | Shahabad          | 27.64 | 79.94 | 141  | 866.05 | 1676.45 | 14.23 | 18.00 | 18234.17 |
| 338 | Shahdhra          | 28.68 | 77.26 | 209  | 861.40 | 1727.55 | 14.65 | 18.43 | 18160.83 |
| 339 | Shahganj          | 27.17 | 77.97 | 176  | 871.08 | 1761.00 | 14.60 | 18.71 | 19037.50 |
| 340 | Shahjahanpur      | 27.88 | 79.91 | 151  | 910.45 | 1832.05 | 15.71 | 19.30 | 18666.67 |
| 341 | Shahpur           | 23.19 | 77.42 | 491  | 871.08 | 1761.00 | 14.60 | 18.71 | 19037.50 |
| 342 | Sheo              | 26.18 | 71.24 | 234  | 867.10 | 1919.60 | 15.79 | 20.03 | 18873.33 |
| 343 | Sheohar           | 26.51 | 85.29 | 56   | 896.05 | 1821.95 | 15.41 | 19.22 | 18864.17 |
| 344 | Sheopur           | 25.67 | 76.69 | 234  | 873.76 | 1844.45 | 15.17 | 19.40 | 19205.00 |
| 345 | Shergarh          | 26.35 | 72.23 | 249  | 872.67 | 2012.75 | 16.85 | 20.81 | 18963.33 |
| 346 | Shikohabad        | 27.1  | 78.58 | 162  | 630.06 | 1298.55 | 16.79 | 20.08 | 18875.31 |
| 347 | Shivpuri          | 25.43 | 77.66 | 465  | 853.50 | 1873.65 | 15.79 | 19.65 | 19405.00 |
| 348 | Sibsagar          | 26.98 | 94.64 | 87   | 905.13 | 1775.20 | 15.53 | 18.83 | 17920.00 |
| 349 | Sidhauli          | 27.28 | 80.83 | 124  | 888.51 | 1764.10 | 14.94 | 18.73 | 18517.50 |
| 350 | Sikandarabad      | 28.45 | 77.69 | 206  | 705.90 | 1371.70 | 14.04 | 17.90 | 18002.02 |
| 351 | Sikandarpur       | 26.03 | 84.03 | 52   | 877.75 | 1847.05 | 15.34 | 19.43 | 18926.67 |
| 352 | Sikandra Rao      | 27.68 | 78.37 | 170  | 871.48 | 1705.20 | 14.47 | 18.24 | 18717.50 |
| 353 | Sikar             | 27.6  | 75.13 | 435  | 731.47 | 1625.10 | 15.12 | 19.37 | 18984.91 |
| 354 | Silchar           | 24.83 | 92.77 | 11   | 906.18 | 2045.40 | 17.53 | 21.08 | 19287.50 |
| 355 | Siliguri          | 26.72 | 88.39 | 109  | 887.63 | 1950.40 | 16.46 | 20.29 | 19129.17 |
| 356 | Sirathu           | 25.64 | 81.32 | 106  | 884.96 | 1735.75 | 14.54 | 18.50 | 19049.17 |
| 357 | Sirmaur           | 30.56 | 77.47 | 1007 | 863.62 | 1786.65 | 14.73 | 18.92 | 19385.00 |
| 358 | Sirsa             | 29.53 | 75.02 | 192  | 837.87 | 1802.35 | 14.76 | 19.05 | 17631.67 |
| 359 | Sitapur           | 27.58 | 80.67 | 127  | 890.71 | 1786.35 | 15.13 | 18.92 | 18451.67 |
| 360 | Siwana            | 28.7  | 76.43 | 209  | 912.62 | 2085.65 | 17.42 | 21.41 | 19155.00 |
| 361 | Siwani            | 28.9  | 75.61 | 201  | 857.91 | 2014.35 | 16.89 | 20.82 | 18183.33 |

|     |              |       |       |     |         |         |       |       |          |
|-----|--------------|-------|-------|-----|---------|---------|-------|-------|----------|
| 362 | Sodam        | 13.55 | 78.91 | 528 | 1048.88 | 2041.05 | 18.72 | 21.04 | 18201.67 |
| 363 | Sohana       | 30.25 | 77.02 | 274 | 884.36  | 1810.55 | 15.66 | 19.12 | 18237.50 |
| 364 | Sojat        | 25.92 | 73.66 | 278 | 873.44  | 1930.00 | 15.97 | 20.12 | 19157.50 |
| 365 | Soraon       | 25.6  | 81.84 | 96  | 907.99  | 1842.65 | 15.54 | 19.39 | 19325.83 |
| 366 | Sri Madhopur | 27.47 | 75.59 | 491 | 819.45  | 1645.30 | 14.81 | 18.73 | 19154.46 |
| 367 | Sujangarh    | 27.7  | 74.46 | 310 | 792.95  | 1681.20 | 15.33 | 19.32 | 19075.45 |
| 368 | Sultanpur    | 26.26 | 82.07 | 98  | 877.80  | 1779.90 | 14.81 | 18.87 | 18895.00 |
| 369 | Suratgarh    | 29.32 | 73.9  | 167 | 580.76  | 1339.40 | 16.77 | 20.59 | 18501.23 |
| 370 | Tanakpur     | 29.07 | 80.1  | 253 | 900.59  | 1598.65 | 14.17 | 17.36 | 17640.00 |
| 371 | Tanda        | 26.54 | 82.66 | 75  | 885.97  | 1827.10 | 15.43 | 19.26 | 18870.83 |
| 372 | Tarabganj    | 26.94 | 81.99 | 90  | 684.23  | 1395.75 | 15.37 | 19.21 | 18583.70 |
| 373 | Tauru        | 28.21 | 76.95 | 266 | 882.71  | 1821.35 | 15.65 | 19.21 | 18191.67 |
| 374 | Tezpur       | 26.65 | 92.79 | 70  | 942.14  | 1824.25 | 15.91 | 19.24 | 19100.83 |
| 375 | Thakurdwara  | 29.19 | 78.86 | 224 | 895.58  | 1801.50 | 15.76 | 19.05 | 17745.83 |
| 376 | Thalli       | 12.58 | 77.65 | 898 | 1030.75 | 2147.20 | 19.76 | 21.93 | 19041.67 |
| 377 | Tijara       | 27.93 | 76.85 | 295 | 857.63  | 1794.10 | 14.83 | 18.98 | 18422.50 |
| 378 | Todabhim     | 26.91 | 76.81 | 251 | 873.71  | 1874.50 | 15.60 | 19.65 | 18921.67 |
| 379 | Tohana       | 29.71 | 75.9  | 226 | 898.25  | 1955.45 | 16.47 | 20.33 | 19228.33 |
| 380 | Tonk         | 26.16 | 75.78 | 281 | 898.25  | 1955.45 | 16.47 | 20.33 | 19228.33 |
| 381 | Tufanganj    | 26.33 | 89.66 | 32  | 926.56  | 1931.50 | 16.47 | 20.13 | 19113.33 |
| 382 | Tura         | 25.51 | 90.2  | 294 | 969.53  | 1840.65 | 16.21 | 19.37 | 18242.50 |
| 383 | Unnao        | 26.53 | 80.48 | 120 | 883.68  | 1865.65 | 15.75 | 19.58 | 18786.67 |
| 384 | Vayittiri    | 11.55 | 76.04 | 750 | 1052.98 | 1959.75 | 18.24 | 20.36 | 18730.83 |
| 385 | Vembavur     | 10.29 | 78.34 | 840 | 1065.19 | 2007.25 | 18.54 | 20.76 | 19133.33 |
| 386 | Zamana       | 25.26 | 83.34 | 88  | 875.83  | 1771.65 | 14.71 | 18.80 | 19347.50 |

**Class #2 (Locations: 58)**

| SrNo | Station     | Lat   | Long  | Alt  | P days (7,21,30) | GDD (4 deg C base temp) | Mean Night temp | Mean T | Mean radn (Kj/day/m2) |
|------|-------------|-------|-------|------|------------------|-------------------------|-----------------|--------|-----------------------|
| 1    | Amalapuram  | 16.57 | 82.00 | 4    | 631.31           | 1455.95                 | 15.17           | 19.21  | 16370.83              |
| 2    | Ambala      | 30.37 | 76.77 | 274  | 631.31           | 1455.95                 | 15.17           | 19.21  | 16370.83              |
| 3    | Ambalaa     | 30.23 | 76.46 | 272  | 631.07           | 1456.30                 | 15.17           | 19.21  | 16368.75              |
| 4    | Anupgarh    | 29.18 | 73.19 | 140  | 583.57           | 1273.95                 | 14.37           | 18.52  | 16629.55              |
| 5    | Askote      | 29.77 | 80.34 | 1291 | 909.13           | 1763.90                 | 16.31           | 18.73  | 16665.00              |
| 6    | Bazpur      | 29.15 | 79.14 | 221  | 926.80           | 1757.85                 | 15.38           | 18.68  | 17356.67              |
| 7    | Bhogpur     | 30.25 | 78.23 | 681  | 845.99           | 1576.65                 | 14.94           | 17.87  | 17029.82              |
| 8    | Chenani     | 33.04 | 75.29 | 1101 | 713.84           | 1371.35                 | 14.47           | 17.34  | 17519.42              |
| 9    | Chikodi     | 16.43 | 74.59 | 640  | 859.21           | 1924.15                 | 20.00           | 22.72  | 16961.17              |
| 10   | Dadupur     | 29.77 | 76.97 | 249  | 856.47           | 1703.10                 | 14.49           | 18.23  | 17469.17              |
| 11   | Dehradun    | 30.32 | 78.03 | 648  | 802.41           | 1491.85                 | 14.78           | 17.85  | 17140.74              |
| 12   | Dibrugarh   | 27.47 | 94.91 | 95   | 917.59           | 1730.05                 | 15.63           | 18.70  | 16670.34              |
| 13   | Gadarpur    | 29.04 | 79.25 | 201  | 922.92           | 1748.35                 | 15.24           | 18.60  | 17412.50              |
| 14   | Gulah       | 27.74 | 79.45 | 137  | 594.16           | 1126.40                 | 13.92           | 17.79  | 17408.54              |
| 15   | Haldwani    | 29.22 | 79.51 | 413  | 930.82           | 1611.20                 | 14.55           | 17.46  | 17375.00              |
| 16   | Imphal      | 24.82 | 93.94 | 774  | 795.28           | 1536.45                 | 15.50           | 18.81  | 17307.69              |
| 17   | Jejuri      | 18.28 | 74.16 | 729  | 978.28           | 2218.05                 | 20.00           | 22.52  | 16940.00              |
| 18   | Junnar      | 19.20 | 73.87 | 684  | 1022.65          | 2238.20                 | 20.29           | 22.69  | 16922.50              |
| 19   | Kalsia      | 30.63 | 75.68 | 238  | 870.54           | 1722.10                 | 15.02           | 18.38  | 17406.67              |
| 20   | Kangra      | 32.10 | 76.27 | 771  | 899.14           | 1514.05                 | 14.30           | 16.65  | 16620.83              |
| 21   | Karanpur    | 30.33 | 78.05 | 686  | 791.08           | 1653.15                 | 13.50           | 17.81  | 17682.50              |
| 22   | Karnaprayag | 30.26 | 79.22 | 742  | 887.91           | 1632.65                 | 14.97           | 17.64  | 17003.33              |
| 23   | Katbari     | 22.22 | 86.01 | 306  | 923.43           | 1943.60                 | 16.58           | 16.74  | 16703.45              |
| 24   | Kathghora   | 22.50 | 82.55 | 314  | 942.92           | 2116.20                 | 18.36           | 18.18  | 16719.58              |
| 25   | Kathgodam   | 29.27 | 79.54 | 524  | 954.40           | 1885.45                 | 17.28           | 19.75  | 17742.50              |
| 26   | Kathua      | 32.39 | 75.52 | 340  | 759.86           | 1569.60                 | 15.23           | 18.57  | 16841.67              |
| 27   | Kharar      | 30.75 | 76.64 | 303  | 633.18           | 1434.40                 | 15.04           | 18.98  | 16181.25              |
| 28   | Kotdwara    | 29.75 | 78.53 | 397  | 970.51           | 1854.15                 | 17.13           | 19.48  | 15707.50              |
| 29   | Kumily      | 9.61  | 77.17 | 884  | 1042.26          | 2151.75                 | 19.78           | 21.96  | 17497.50              |
| 30   | Landsdown   | 29.84 | 78.69 | 1713 | 865.62           | 1616.75                 | 16.19           | 18.60  | 16188.29              |
| 31   | Ludhiana    | 30.90 | 75.86 | 247  | 549.88           | 1025.10                 | 12.53           | 16.70  | 17012.35              |
| 32   | Madhopur    | 32.37 | 75.60 | 353  | 892.65           | 1747.25                 | 14.97           | 18.59  | 16212.50              |
| 33   | Mahrauli    | 31.25 | 76.46 | 308  | 662.16           | 1446.45                 | 15.04           | 18.76  | 16503.06              |
| 34   | Mandya      | 12.52 | 76.90 | 665  | 466.99           | 1089.30                 | 21.35           | 23.52  | 17339.29              |

|    |                     |       |       |      |         |         |       |       |          |
|----|---------------------|-------|-------|------|---------|---------|-------|-------|----------|
| 35 | Mat                 | 29.64 | 79.65 | 1729 | 638.44  | 1484.60 | 15.39 | 19.46 | 17347.92 |
| 36 | Mount Abu           | 24.59 | 72.71 | 1189 | 914.28  | 1768.80 | 15.91 | 18.77 | 17775.00 |
| 37 | Muhammadabad        | 26.03 | 83.38 | 67   | 885.45  | 1806.35 | 15.07 | 15.91 | 16047.92 |
| 38 | Murwara             | 23.83 | 80.4  | 366  | 912.93  | 1926.75 | 16.36 | 16.18 | 15997.99 |
| 39 | Muzaffarnagar       | 29.47 | 77.7  | 239  | 889.06  | 1749.20 | 15.19 | 18.01 | 17202.42 |
| 40 | Nakodar             | 31.12 | 75.48 | 226  | 668.99  | 1545.20 | 15.14 | 19.19 | 16290.20 |
| 41 | Nakur               | 29.91 | 77.3  | 263  | 862.89  | 1671.80 | 14.43 | 17.97 | 17344.17 |
| 42 | North Lakhimpur     | 27.22 | 94.1  | 77   | 955.08  | 1787.95 | 15.75 | 18.93 | 17136.67 |
| 43 | Palampur            | 32.11 | 76.53 | 1257 | 874.41  | 1608.00 | 15.37 | 17.43 | 16281.67 |
| 44 | Panki               | 26.46 | 80.24 | 120  | 921.18  | 1732.10 | 16.09 | 18.47 | 16653.33 |
| 45 | Partapganj          | 26.29 | 86.96 | 60   | 881.51  | 1873.90 | 15.81 | 15.82 | 15471.81 |
| 46 | Pathankot           | 32.26 | 75.64 | 320  | 802.65  | 1547.25 | 14.74 | 18.10 | 17471.82 |
| 47 | Patiala             | 30.33 | 76.38 | 252  | 633.45  | 1474.90 | 15.38 | 19.41 | 16351.04 |
| 48 | Peraiyur            | 9.73  | 77.7  | 168  | 1040.74 | 1791.80 | 17.01 | 18.97 | 16774.17 |
| 49 | Raipur I            | 26.11 | 80.8  | 108  | 892.48  | 1564.45 | 14.21 | 17.07 | 16857.50 |
| 50 | Rajpur              | 30.38 | 78.08 | 883  | 878.36  | 1625.85 | 14.80 | 17.58 | 16747.50 |
| 51 | Ramnagar            | 29.39 | 79.12 | 350  | 924.36  | 1674.80 | 15.25 | 17.99 | 17252.50 |
| 52 | Reasi               | 33.08 | 74.83 | 527  | 794.82  | 1493.20 | 13.25 | 16.48 | 16333.33 |
| 53 | Samba               | 31.95 | 76.5  | 761  | 822.85  | 1498.30 | 13.37 | 16.52 | 16351.67 |
| 54 | Sidlaghatta         | 13.39 | 77.86 | 897  | 978.20  | 2300.55 | 20.91 | 23.20 | 17606.67 |
| 55 | Sri Ranbirsinghpura | 32.65 | 74.83 | 260  | 822.13  | 1537.40 | 13.53 | 16.85 | 16511.67 |
| 56 | Srinagar UK         | 34.08 | 74.79 | 1579 | 902.81  | 1541.65 | 14.29 | 16.88 | 17133.33 |
| 57 | Tibri               | 32    | 75.45 | 263  | 738.43  | 1527.75 | 14.80 | 18.32 | 17047.66 |
| 58 | Uthamapalayam       | 9.8   | 77.32 | 375  | 469.75  | 1191.55 | 21.89 | 24.26 | 17744.07 |

**Class #3 (Locations: 540)**

| <b>Sr No</b> | <b>Station</b>  | <b>Lat</b> | <b>Long</b> | <b>Alt</b> | <b>P days (7,21,30)</b> | <b>GDD (4 deg C base temp)</b> | <b>Mean Nifgt temp</b> | <b>Mean T</b> | <b>Mean radn (Kj/day/m2)</b> |
|--------------|-----------------|------------|-------------|------------|-------------------------|--------------------------------|------------------------|---------------|------------------------------|
| 1            | Amalner         | 18.94      | 75.33       | 698        | 400.04                  | 1026.20                        | 18.99                  | 23.08         | 21255.56                     |
| 2            | Amarpur         | 25.03      | 86.90       | 60         | 941.35                  | 2115.35                        | 18.13                  | 21.66         | 20117.50                     |
| 3            | Amarwara        | 22.29      | 79.16       | 809        | 921.47                  | 1704.00                        | 14.63                  | 18.23         | 20104.17                     |
| 4            | Ambagarh Chowki | 20.77      | 80.74       | 325        | 579.41                  | 1197.65                        | 16.46                  | 20.24         | 20651.35                     |
| 5            | Ambari          | 30.49      | 77.81       | 502        | 579.41                  | 1197.65                        | 16.46                  | 20.24         | 20651.35                     |
| 6            | Ambikanagar     | 15.12      | 74.65       | 497        | 929.12                  | 2077.35                        | 17.81                  | 21.34         | 20289.17                     |
| 7            | Amraoti         | 21.64      | 78.18       | 694        | 913.26                  | 2144.90                        | 18.10                  | 21.91         | 20840.00                     |
| 8            | Anand           | 22.56      | 72.92       | 34         | 832.65                  | 2234.50                        | 18.00                  | 22.65         | 20584.17                     |
| 9            | Anandpur        | 21.21      | 86.12       | 42         | 685.36                  | 1697.70                        | 19.05                  | 22.70         | 20765.93                     |
| 10           | Angul           | 20.84      | 85.15       | 109        | 799.54                  | 2021.70                        | 19.09                  | 22.76         | 21011.11                     |
| 11           | Anjangaon       | 18.08      | 75.60       | 481        | 937.45                  | 1990.45                        | 17.16                  | 20.62         | 20391.67                     |
| 12           | Anjar           | 23.11      | 70.02       | 64         | 463.96                  | 1130.85                        | 17.06                  | 21.46         | 19709.23                     |
| 13           | Antagarh        | 20.09      | 81.15       | 363        | 731.45                  | 1714.25                        | 17.33                  | 21.36         | 21137.37                     |
| 14           | Arambagh        | 22.87      | 87.79       | 12         | 876.66                  | 2197.15                        | 18.65                  | 22.34         | 20376.67                     |
| 15           | Arang           | 21.19      | 81.96       | 277        | 905.86                  | 2234.65                        | 19.04                  | 22.66         | 20512.50                     |
| 16           | Armoor          | 18.79      | 78.29       | 371        | 878.18                  | 2295.65                        | 19.92                  | 23.49         | 20668.64                     |
| 17           | Arogyavaram     | 18.94      | 84.58       | 20         | 994.97                  | 2225.15                        | 19.86                  | 22.58         | 20075.83                     |
| 18           | Arvi            | 20.63      | 79.14       | 260        | 771.27                  | 1998.60                        | 19.98                  | 23.44         | 20400.00                     |
| 19           | Asansol         | 23.67      | 86.95       | 117        | 723.20                  | 1715.75                        | 18.36                  | 22.10         | 19643.16                     |
| 20           | Asifabad        | 19.36      | 79.29       | 201        | 440.68                  | 1000.95                        | 19.35                  | 22.61         | 21255.56                     |
| 21           | Aslali          | 22.91      | 72.59       | 37         | 863.67                  | 2163.05                        | 17.67                  | 22.06         | 20352.50                     |
| 22           | Asola           | 28.46      | 77.19       | 259        | 898.79                  | 2224.90                        | 18.77                  | 22.57         | 21002.50                     |
| 23           | Astha           | 23.19      | 77.44       | 478        | 894.19                  | 2002.65                        | 16.68                  | 20.72         | 20011.67                     |
| 24           | Atmakur         | 15.88      | 78.59       | 286        | 677.72                  | 1679.40                        | 20.81                  | 23.57         | 20838.37                     |
| 25           | Atner           | 21.62      | 77.91       | 661        | 922.53                  | 2014.05                        | 17.18                  | 20.82         | 19976.67                     |
| 26           | Atru            | 24.88      | 76.67       | 284        | 841.72                  | 1978.35                        | 16.00                  | 20.52         | 19642.50                     |
| 27           | Aurangabad      | 19.88      | 75.34       | 594        | 715.11                  | 1820.80                        | 17.84                  | 22.25         | 20994.00                     |
| 28           | Azimganj        | 24.23      | 88.25       | 14         | 903.92                  | 2074.15                        | 17.49                  | 21.32         | 19985.00                     |
| 29           | Badnagar        | 23.03      | 75.37       | 500        | 888.19                  | 2045.95                        | 16.97                  | 21.08         | 20009.17                     |
| 30           | Badnera         | 20.85      | 77.73       | 324        | 904.18                  | 2161.95                        | 18.19                  | 22.05         | 20738.33                     |

|    |              |       |       |     |        |         |       |       |          |
|----|--------------|-------|-------|-----|--------|---------|-------|-------|----------|
| 31 | Bagodar      | 24.05 | 85.83 | 383 | 953.56 | 1843.55 | 16.03 | 19.40 | 19670.83 |
| 32 | Bahoribund   | 23.66 | 80.06 | 421 | 925.77 | 1893.15 | 16.21 | 19.81 | 19894.17 |
| 33 | Baihar       | 22.10 | 80.54 | 546 | 875.77 | 1788.45 | 15.01 | 18.94 | 20084.17 |
| 34 | Bajag        | 22.67 | 81.35 | 780 | 901.21 | 1641.00 | 14.46 | 17.82 | 19959.66 |
| 35 | Bakani       | 22.47 | 86.59 | 34  | 898.79 | 1915.25 | 15.87 | 19.99 | 19781.67 |
| 36 | Balapur      | 19.53 | 77.41 | 417 | 570.08 | 1595.55 | 20.17 | 23.99 | 20216.25 |
| 37 | Balasinor    | 22.95 | 73.33 | 86  | 439.84 | 1301.35 | 17.93 | 22.86 | 20827.54 |
| 38 | Balasore     | 21.48 | 86.92 | 17  | 585.63 | 1382.90 | 18.32 | 22.01 | 20467.53 |
| 39 | Balliguda    | 20.19 | 83.00 | 540 | 950.34 | 1891.85 | 16.67 | 19.80 | 20168.33 |
| 40 | Balodabazar  | 21.65 | 82.10 | 252 | 913.43 | 2231.35 | 18.91 | 22.63 | 20691.67 |
| 41 | Balumath     | 23.82 | 84.78 | 546 | 900.79 | 1715.80 | 14.58 | 18.33 | 19895.83 |
| 42 | Bankura      | 23.23 | 87.07 | 72  | 904.17 | 2117.50 | 18.10 | 21.68 | 19993.33 |
| 43 | Bano         | 22.64 | 84.92 | 478 | 955.97 | 1974.95 | 17.23 | 20.49 | 19930.00 |
| 44 | Banswara     | 23.54 | 74.43 | 211 | 478.67 | 1255.50 | 19.73 | 23.38 | 20186.15 |
| 45 | Baraset      | 22.43 | 88.29 | 6   | 864.24 | 2178.60 | 18.71 | 22.50 | 20633.05 |
| 46 | Barerakalan  | 23.06 | 80.02 | 428 | 913.05 | 1864.25 | 15.86 | 19.57 | 19973.33 |
| 47 | Barhi        | 24.30 | 85.41 | 376 | 760.43 | 1692.80 | 17.47 | 21.14 | 19566.67 |
| 48 | Bari         | 26.39 | 77.36 | 191 | 806.09 | 1684.45 | 15.52 | 19.35 | 19406.36 |
| 49 | Baripada     | 21.93 | 86.75 | 40  | 909.36 | 2177.45 | 18.62 | 22.18 | 20480.83 |
| 50 | Barjora      | 23.42 | 87.28 | 77  | 915.79 | 2107.40 | 17.94 | 21.60 | 20016.67 |
| 51 | Barrachpore  | 22.76 | 88.38 | 6   | 705.23 | 1689.85 | 18.19 | 22.02 | 20081.91 |
| 52 | Basirhat     | 22.65 | 88.86 | 8   | 856.26 | 2194.30 | 18.87 | 22.63 | 20464.41 |
| 53 | Basoda       | 23.85 | 77.92 | 419 | 924.44 | 2049.05 | 17.16 | 21.11 | 20130.83 |
| 54 | Begumpet     | 17.44 | 78.46 | 518 | 929.94 | 2265.05 | 19.72 | 22.91 | 20822.50 |
| 55 | Belathal     | 24.70 | 73.97 | 490 | 857.32 | 1808.85 | 14.68 | 19.11 | 19620.83 |
| 56 | Belonia      | 23.25 | 91.46 | 27  | 590.25 | 1304.95 | 18.54 | 21.93 | 19394.52 |
| 57 | Bemetara     | 21.71 | 81.53 | 284 | 865.66 | 2004.50 | 18.18 | 21.77 | 20353.10 |
| 58 | Berhampore   | 24.09 | 88.26 | 14  | 884.88 | 2072.10 | 17.51 | 21.30 | 19859.17 |
| 59 | Berhampur    | 19.31 | 84.79 | 26  | 684.51 | 1671.75 | 20.27 | 23.26 | 20628.74 |
| 60 | Betul        | 21.91 | 77.90 | 650 | 918.45 | 2019.60 | 17.18 | 20.86 | 19877.50 |
| 61 | Bhadgaon     | 20.66 | 75.22 | 256 | 432.23 | 1126.25 | 17.98 | 22.53 | 21059.02 |
| 62 | Bhadrachalam | 17.66 | 80.89 | 71  | 763.24 | 2254.25 | 21.39 | 24.72 | 21097.25 |
| 63 | Bhadrak      | 21.05 | 86.49 | 12  | 583.90 | 1393.50 | 18.41 | 22.15 | 20509.09 |
| 64 | Bhagwanpur   | 26.12 | 85.36 | 50  | 864.12 | 2231.10 | 19.36 | 22.94 | 20520.34 |

|    |                |       |       |     |         |         |       |       |          |
|----|----------------|-------|-------|-----|---------|---------|-------|-------|----------|
| 65 | Bhakarapet     | 14.41 | 78.95 | 136 | 1026.31 | 2081.80 | 18.84 | 21.38 | 20372.50 |
| 66 | Bhandara       | 21.17 | 79.65 | 248 | 872.46  | 2065.10 | 17.88 | 21.84 | 20888.79 |
| 67 | Bhanupratappur | 20.29 | 81.07 | 353 | 897.79  | 2063.40 | 17.33 | 21.23 | 20938.33 |
| 68 | Bhatagaon      | 21.21 | 81.62 | 279 | 717.38  | 1757.60 | 18.13 | 22.16 | 20610.31 |
| 69 | Bhawaniapatna  | 19.90 | 83.16 | 249 | 880.46  | 2211.15 | 19.41 | 22.93 | 20962.39 |
| 70 | Bhillai        | 21.19 | 81.35 | 287 | 894.44  | 2054.80 | 17.87 | 21.60 | 20811.11 |
| 71 | Bhilsa         | 23.52 | 77.80 | 429 | 928.32  | 2035.70 | 17.09 | 21.00 | 20183.33 |
| 72 | Bhind          | 26.55 | 78.78 | 142 | 802.23  | 1697.85 | 15.62 | 19.47 | 19430.91 |
| 73 | Bhinmal        | 25.00 | 72.26 | 156 | 881.62  | 2244.40 | 18.87 | 22.74 | 19533.33 |
| 74 | Bhopal         | 23.25 | 77.41 | 484 | 703.15  | 1964.20 | 19.63 | 23.68 | 19603.00 |
| 75 | Bhubneshwar    | 20.29 | 85.82 | 33  | 546.58  | 1425.05 | 20.01 | 23.58 | 20478.08 |
| 76 | Bhuj           | 23.24 | 69.66 | 100 | 476.41  | 1187.05 | 17.45 | 21.78 | 19911.94 |
| 77 | Bhungra        | 23.41 | 74.31 | 244 | 847.62  | 2191.30 | 18.13 | 22.45 | 20032.77 |
| 78 | Bhusaval       | 21.04 | 75.80 | 209 | 466.93  | 1148.30 | 18.20 | 22.29 | 20811.11 |
| 79 | Bichhia        | 22.45 | 80.71 | 628 | 871.55  | 1671.95 | 13.88 | 17.97 | 19915.83 |
| 80 | Bidar          | 17.91 | 77.05 | 662 | 786.52  | 1959.65 | 19.38 | 22.88 | 20689.42 |
| 81 | Bijanagar      | 25.92 | 74.65 | 398 | 823.34  | 1739.20 | 14.03 | 18.53 | 19517.50 |
| 82 | Bikaunthpur    | 23.27 | 82.55 | 554 | 963.78  | 1937.75 | 17.06 | 20.18 | 19774.17 |
| 83 | Bishnupur      | 23.06 | 87.31 | 71  | 931.81  | 1752.80 | 15.51 | 18.64 | 19558.33 |
| 84 | Bobbili        | 18.57 | 83.35 | 127 | 721.53  | 1833.05 | 20.43 | 23.54 | 20477.66 |
| 85 | Bodalkasa      | 21.75 | 79.79 | 217 | 902.33  | 2196.80 | 18.54 | 22.34 | 21142.50 |
| 86 | Boinchee       | 23.12 | 88.19 | 5   | 740.86  | 1739.90 | 17.87 | 21.62 | 20044.44 |
| 87 | Bolpur         | 23.66 | 87.68 | 46  | 749.11  | 1723.65 | 17.71 | 21.45 | 19939.39 |
| 88 | Bongaon        | 23.04 | 88.82 | 9   | 851.24  | 2179.00 | 18.29 | 22.34 | 20547.06 |
| 89 | Bonth          | 21.12 | 86.30 | 25  | 578.43  | 1389.10 | 18.56 | 22.33 | 20588.16 |
| 90 | Bori           | 20.91 | 79.01 | 240 | 949.94  | 1983.85 | 16.91 | 20.57 | 20477.50 |
| 91 | Borina         | 25.06 | 76.39 | 270 | 924.25  | 1943.95 | 16.60 | 20.23 | 19853.33 |
| 92 | Borsad         | 22.41 | 72.89 | 27  | 477.72  | 1226.35 | 19.01 | 22.93 | 20116.92 |
| 93 | Budhana        | 29.28 | 77.47 | 231 | 890.12  | 1777.70 | 15.43 | 18.85 | 17838.33 |
| 94 | Burdwan        | 23.23 | 87.86 | 27  | 929.37  | 2104.65 | 18.14 | 21.57 | 19999.17 |
| 95 | Burhanpur      | 21.31 | 76.22 | 253 | 759.77  | 1928.85 | 18.55 | 22.59 | 20634.62 |
| 96 | Chaibasa       | 22.55 | 85.80 | 233 | 856.37  | 1907.20 | 17.44 | 21.06 | 20335.71 |
| 97 | Chakaibanda    | 24.32 | 86.24 | 290 | 902.56  | 1837.35 | 15.74 | 19.34 | 19495.83 |
| 98 | Chakradhanpur  | 22.68 | 85.63 | 224 | 871.16  | 1527.90 | 14.08 | 17.09 | 19637.61 |



|     |             |       |       |      |        |         |       |       |          |
|-----|-------------|-------|-------|------|--------|---------|-------|-------|----------|
| 99  | Chalisgaon  | 20.46 | 75.00 | 349  | 822.93 | 2196.05 | 18.72 | 22.97 | 21137.93 |
| 100 | Champa      | 22.03 | 82.65 | 247  | 580.79 | 1307.75 | 17.96 | 21.73 | 20198.65 |
| 101 | Champua     | 22.06 | 85.67 | 386  | 921.33 | 1855.25 | 15.75 | 19.49 | 20365.83 |
| 102 | Chandbali   | 20.77 | 86.74 | 6    | 889.43 | 1921.75 | 16.20 | 20.05 | 19578.33 |
| 103 | Chanditala  | 22.69 | 88.27 | 7    | 902.93 | 2161.80 | 18.30 | 22.05 | 20675.83 |
| 104 | Chandpur    | 29.14 | 78.27 | 226  | 906.95 | 2236.65 | 19.10 | 22.67 | 20647.50 |
| 105 | Chandrakona | 22.73 | 87.52 | 35   | 784.02 | 1982.85 | 18.42 | 22.40 | 20568.52 |
| 106 | Channagiri  | 14.02 | 75.93 | 671  | 946.41 | 2225.30 | 19.33 | 22.58 | 20992.50 |
| 107 | Charchal    | 25.20 | 87.55 | 33   | 889.43 | 1921.75 | 16.20 | 20.05 | 19578.33 |
| 108 | Charkhari   | 25.40 | 79.75 | 185  | 827.04 | 1767.80 | 14.27 | 18.77 | 19495.00 |
| 109 | Chaurai     | 22.05 | 79.25 | 639  | 882.09 | 1904.45 | 15.76 | 19.90 | 20369.17 |
| 110 | Chicholi    | 21.49 | 79.71 | 303  | 941.62 | 1923.70 | 16.47 | 20.06 | 20249.17 |
| 111 | Chikhalda   | 21.40 | 77.33 | 1079 | 914.14 | 1758.30 | 15.27 | 18.69 | 20067.50 |
| 112 | Chikhli     | 20.76 | 73.06 | 24   | 656.83 | 1838.70 | 20.16 | 24.03 | 20891.30 |
| 113 | Chimur      | 20.50 | 79.37 | 240  | 753.05 | 1756.75 | 17.58 | 21.61 | 20597.00 |
| 114 | Chindwara   | 22.06 | 78.94 | 676  | 933.54 | 1920.05 | 16.40 | 20.03 | 20225.83 |
| 115 | Chintakunta | 17.29 | 77.79 | 525  | 676.03 | 1797.90 | 20.44 | 23.80 | 21242.86 |
| 116 | Chitradurg  | 14.23 | 76.40 | 713  | 812.84 | 1997.30 | 20.66 | 23.43 | 20429.13 |
| 117 | Chodavaram  | 17.83 | 82.93 | 42   | 606.80 | 1447.20 | 20.73 | 23.35 | 19644.00 |
| 118 | Chopda      | 21.25 | 75.30 | 188  | 401.33 | 1003.00 | 18.48 | 22.65 | 21224.07 |
| 119 | Chorkhamara | 21.27 | 79.96 | 306  | 909.57 | 2223.25 | 18.91 | 22.56 | 20740.83 |
| 120 | Chotan      | 26.85 | 80.95 | 112  | 682.06 | 1475.75 | 16.71 | 20.44 | 19482.22 |
| 121 | Chuda       | 22.48 | 71.69 | 70   | 844.25 | 2068.70 | 16.76 | 21.27 | 20577.50 |
| 122 | Cuttack     | 20.46 | 85.88 | 26   | 540.50 | 1423.65 | 19.88 | 23.56 | 20658.90 |
| 123 | Damoh       | 23.84 | 79.44 | 377  | 736.91 | 1565.05 | 16.50 | 20.34 | 19790.63 |
| 124 | Danpur      | 25.27 | 83.26 | 69   | 878.71 | 2094.40 | 17.18 | 21.49 | 20322.50 |
| 125 | Dansa       | 22.53 | 88.87 | 12   | 769.35 | 1924.30 | 18.62 | 22.54 | 20802.88 |
| 126 | Dantan      | 21.91 | 87.27 | 14   | 931.61 | 2195.35 | 18.96 | 22.33 | 20239.17 |
| 127 | Dantewara   | 18.85 | 81.38 | 385  | 896.01 | 2222.80 | 18.88 | 22.56 | 21032.50 |
| 128 | Darwha      | 20.31 | 77.77 | 330  | 749.11 | 1850.25 | 17.95 | 22.18 | 20915.69 |
| 129 | Daryapur    | 20.92 | 77.33 | 270  | 769.35 | 1924.30 | 18.62 | 22.54 | 20802.88 |
| 130 | Datia       | 25.67 | 78.46 | 252  | 640.04 | 1274.85 | 14.89 | 18.53 | 19477.27 |
| 131 | Deesa       | 24.26 | 72.19 | 141  | 848.78 | 2138.65 | 17.57 | 21.86 | 19731.67 |
| 132 | Deobhog     | 19.90 | 82.66 | 247  | 520.78 | 1388.45 | 18.72 | 23.07 | 21228.77 |

|     |                 |       |       |      |        |         |       |       |          |
|-----|-----------------|-------|-------|------|--------|---------|-------|-------|----------|
| 133 | Deogarh         | 21.54 | 84.73 | 200  | 905.48 | 2007.25 | 17.62 | 21.19 | 20386.32 |
| 134 | Deolapur        | 26.66 | 82.74 | 80   | 927.57 | 2149.60 | 18.38 | 21.95 | 20616.67 |
| 135 | Deolgaonraja    | 20.63 | 75.99 | 393  | 745.67 | 1932.75 | 18.40 | 22.62 | 20530.77 |
| 136 | Deori           | 23.39 | 79.02 | 429  | 884.72 | 2091.75 | 18.20 | 21.91 | 20316.24 |
| 137 | Deuli           | 22.08 | 87.33 | 17   | 742.85 | 1805.70 | 18.60 | 22.28 | 19909.09 |
| 138 | Dewas Senior    | 22.96 | 76.05 | 532  | 886.72 | 1977.70 | 16.37 | 20.51 | 20194.17 |
| 139 | Dhamangaon      | 20.79 | 78.14 | 293  | 429.25 | 1267.95 | 20.56 | 24.52 | 20430.65 |
| 140 | Dhambola        | 23.59 | 73.77 | 220  | 486.99 | 1138.55 | 17.49 | 21.58 | 19769.23 |
| 141 | Dhanbad         | 23.80 | 86.43 | 249  | 920.65 | 2031.20 | 17.44 | 20.96 | 19828.33 |
| 142 | Dhanora         | 22.38 | 73.10 | 23   | 719.53 | 1668.95 | 17.71 | 21.61 | 20745.26 |
| 143 | Dhanwar         | 24.41 | 85.98 | 341  | 930.43 | 1880.90 | 16.17 | 19.71 | 19461.67 |
| 144 | Dharamanagar    | 24.38 | 92.15 | 17   | 577.77 | 1269.60 | 17.43 | 21.21 | 19256.76 |
| 145 | Dharamjaigarh   | 22.46 | 83.21 | 299  | 690.83 | 1748.20 | 17.92 | 22.06 | 20849.48 |
| 146 | Dharamsala      | 32.22 | 76.32 | 1321 | 559.91 | 1357.65 | 18.97 | 22.65 | 20678.08 |
| 147 | Dharni          | 21.55 | 76.89 | 310  | 861.88 | 2232.20 | 18.28 | 22.64 | 20969.17 |
| 148 | Dhond           | 18.65 | 75.31 | 568  | 870.53 | 2304.20 | 19.38 | 23.24 | 20957.50 |
| 149 | Dhoraji         | 21.74 | 70.45 | 55   | 838.28 | 2354.05 | 19.73 | 23.65 | 20590.83 |
| 150 | Dhrangadhra     | 22.98 | 71.47 | 60   | 846.75 | 2215.90 | 18.13 | 22.50 | 20410.83 |
| 151 | Dhuti           | 22.12 | 80.06 | 304  | 594.20 | 1339.40 | 17.78 | 21.45 | 19977.92 |
| 152 | Diamond Harbour | 22.20 | 88.20 | 5    | 594.20 | 1339.40 | 17.78 | 21.45 | 19977.92 |
| 153 | Digras          | 18.41 | 76.95 | 624  | 741.32 | 1868.65 | 18.07 | 22.36 | 20971.57 |
| 154 | Dindori         | 20.20 | 73.83 | 625  | 994.53 | 1962.60 | 17.29 | 20.39 | 19935.00 |
| 155 | Dindoria        | 22.94 | 81.08 | 667  | 923.80 | 1951.20 | 16.53 | 20.29 | 20124.17 |
| 156 | Dinhata         | 26.13 | 89.47 | 33   | 923.80 | 1951.20 | 16.53 | 20.29 | 20124.17 |
| 157 | Donegaon        | 20.11 | 76.43 | 571  | 938.93 | 2055.15 | 17.53 | 21.16 | 20550.83 |
| 158 | Dongargaon      | 20.97 | 80.85 | 305  | 611.16 | 1352.60 | 16.64 | 20.75 | 20637.04 |
| 159 | Dudhi           | 24.22 | 83.24 | 239  | 923.53 | 1804.05 | 15.30 | 19.07 | 19810.83 |
| 160 | Dug             | 23.93 | 75.83 | 495  | 888.77 | 2054.45 | 17.34 | 21.15 | 19760.83 |
| 161 | Dumdum          | 22.65 | 88.43 | 8    | 865.82 | 2175.75 | 18.72 | 22.47 | 20589.83 |
| 162 | Dumri           | 24.00 | 86.00 | 274  | 947.64 | 2037.20 | 17.65 | 21.01 | 19633.33 |
| 163 | Dungarpur       | 23.84 | 73.71 | 287  | 874.54 | 1979.35 | 16.38 | 20.53 | 19935.83 |
| 164 | Durg            | 21.19 | 81.28 | 297  | 890.65 | 2061.80 | 17.88 | 21.66 | 20816.24 |
| 165 | Dwarka          | 22.24 | 68.97 | 6    | 890.65 | 2061.80 | 17.88 | 21.66 | 20816.24 |
| 166 | Edalabad        | 21.05 | 76.06 | 215  | 489.68 | 1206.30 | 18.71 | 22.62 | 20549.23 |

|     |               |       |       |     |        |         |       |       |          |
|-----|---------------|-------|-------|-----|--------|---------|-------|-------|----------|
| 167 | Gadarwara     | 22.92 | 78.78 | 333 | 937.52 | 2037.95 | 17.43 | 21.02 | 20135.00 |
| 168 | Gandai        | 21.67 | 81.10 | 327 | 883.55 | 2044.25 | 17.55 | 21.51 | 20838.46 |
| 169 | Gangajalghati | 23.42 | 87.11 | 109 | 902.66 | 2099.85 | 17.93 | 21.53 | 19966.67 |
| 170 | Ganganagar    | 29.90 | 73.88 | 169 | 419.60 | 966.80  | 17.51 | 21.34 | 19794.64 |
| 171 | Gannavaram    | 16.54 | 80.80 | 13  | 432.99 | 1193.90 | 21.63 | 24.65 | 21324.14 |
| 172 | Gargoti       | 16.32 | 74.14 | 556 | 916.65 | 2330.00 | 20.20 | 23.45 | 20242.50 |
| 173 | Garhakota     | 23.78 | 79.14 | 388 | 956.48 | 1963.70 | 16.92 | 20.40 | 20116.67 |
| 174 | Gariabund     | 20.63 | 82.06 | 336 | 909.12 | 2163.50 | 18.42 | 22.06 | 20304.17 |
| 175 | Garotha       | 25.92 | 82.63 | 76  | 822.14 | 1668.70 | 13.58 | 17.94 | 19454.17 |
| 176 | Garothaa      | 24.20 | 75.39 | 411 | 910.75 | 1937.75 | 16.23 | 20.18 | 19710.00 |
| 177 | Gattasili     | 20.45 | 81.80 | 401 | 929.55 | 1969.05 | 16.77 | 20.44 | 20610.83 |
| 178 | Gazole        | 25.21 | 88.19 | 42  | 919.49 | 1910.15 | 16.18 | 19.95 | 19531.67 |
| 179 | Ghansore      | 22.66 | 79.94 | 553 | 912.29 | 1954.30 | 16.72 | 20.32 | 19940.00 |
| 180 | Ghatal        | 22.66 | 87.75 | 10  | 874.42 | 2208.25 | 18.74 | 22.44 | 20403.33 |
| 181 | Gohad         | 26.45 | 78.43 | 157 | 809.53 | 1709.15 | 15.59 | 19.43 | 19477.48 |
| 182 | Gondal        | 21.96 | 70.79 | 132 | 919.30 | 2130.95 | 18.04 | 21.79 | 20696.67 |
| 183 | Gondia        | 21.46 | 80.22 | 293 | 591.14 | 1359.00 | 18.56 | 21.93 | 20319.74 |
| 184 | Gopalpur      | 19.26 | 84.86 | 19  | 750.30 | 1810.30 | 20.06 | 23.10 | 20569.47 |
| 185 | Gosaba        | 22.17 | 88.81 | 8   | 889.37 | 2231.90 | 19.08 | 22.63 | 20482.50 |
| 186 | Guna          | 24.63 | 77.30 | 485 | 898.30 | 1843.65 | 15.35 | 19.40 | 19582.50 |
| 187 | Guntur        | 16.31 | 80.44 | 19  | 431.51 | 1162.25 | 21.46 | 24.46 | 21187.72 |
| 188 | Gwalior       | 26.22 | 78.18 | 226 | 707.21 | 1529.35 | 14.95 | 19.03 | 19326.47 |
| 189 | Harda         | 22.34 | 77.10 | 283 | 892.75 | 2160.30 | 17.90 | 22.04 | 20565.00 |
| 190 | Harduamarar   | 23.46 | 79.33 | 366 | 938.07 | 1924.80 | 16.50 | 20.07 | 20055.00 |
| 191 | Harrai        | 22.62 | 79.22 | 576 | 912.70 | 1829.15 | 15.45 | 19.28 | 20433.33 |
| 192 | Harsud        | 22.10 | 76.74 | 260 | 475.87 | 1194.75 | 18.40 | 22.44 | 20718.46 |
| 193 | Hatta         | 24.13 | 79.60 | 322 | 906.09 | 1979.40 | 16.67 | 20.53 | 19675.00 |
| 194 | Hazaribagh    | 24.00 | 85.37 | 601 | 922.70 | 1754.95 | 15.24 | 18.66 | 19547.50 |
| 195 | Himatnagar    | 23.60 | 72.96 | 140 | 890.56 | 2045.60 | 16.98 | 21.08 | 20010.00 |
| 196 | Himayat Sagar | 17.31 | 78.36 | 544 | 783.22 | 1895.70 | 19.13 | 22.62 | 20664.71 |
| 197 | Hinganghat    | 20.55 | 78.84 | 222 | 471.15 | 1173.80 | 18.18 | 22.40 | 20870.31 |
| 198 | Hingoli       | 19.72 | 77.15 | 459 | 837.32 | 1996.15 | 18.57 | 22.18 | 20237.27 |
| 199 | Hiwarkhed     | 21.13 | 76.86 | 313 | 741.93 | 1984.75 | 20.30 | 23.69 | 20630.69 |
| 200 | Hoshangabad   | 22.74 | 77.74 | 305 | 923.77 | 2162.40 | 18.47 | 22.05 | 20198.33 |

|     |              |       |       |     |         |         |       |       |          |
|-----|--------------|-------|-------|-----|---------|---------|-------|-------|----------|
| 201 | Howarh       | 22.60 | 88.26 | 4   | 903.06  | 2155.70 | 18.32 | 22.00 | 20160.00 |
| 202 | Huzurabad    | 18.20 | 79.40 | 260 | 750.66  | 1971.05 | 20.06 | 23.55 | 20973.27 |
| 203 | Igatpuri     | 19.70 | 73.56 | 584 | 1006.98 | 1970.85 | 17.67 | 20.46 | 20870.00 |
| 204 | Iklera       | 25.02 | 76.54 | 270 | 867.97  | 1968.30 | 16.15 | 20.44 | 19840.00 |
| 205 | Indore       | 22.72 | 75.86 | 538 | 842.85  | 1977.45 | 15.98 | 20.51 | 20365.00 |
| 206 | Indpur       | 23.16 | 86.94 | 128 | 724.20  | 1706.90 | 18.26 | 22.01 | 19778.95 |
| 207 | Indus        | 23.09 | 87.38 | 39  | 751.88  | 1747.15 | 18.03 | 21.69 | 20009.09 |
| 208 | Itahar       | 25.45 | 88.17 | 25  | 914.08  | 1941.85 | 16.61 | 20.22 | 19565.83 |
| 209 | Jabalpur     | 23.18 | 79.99 | 411 | 896.41  | 1840.70 | 15.63 | 19.37 | 19812.50 |
| 210 | Jabera       | 23.56 | 79.68 | 347 | 867.29  | 1962.70 | 16.20 | 20.39 | 20105.83 |
| 211 | Jactial      | 18.79 | 78.91 | 285 | 697.15  | 1959.80 | 19.91 | 23.84 | 20895.96 |
| 212 | Jagatsingpur | 20.25 | 86.17 | 9   | 702.91  | 1863.65 | 20.27 | 23.66 | 20529.47 |
| 213 | Jagpura      | 25.06 | 75.87 | 334 | 864.63  | 2140.70 | 17.57 | 21.87 | 20262.50 |
| 214 | Jaipur       | 26.91 | 75.79 | 430 | 917.55  | 1983.70 | 16.99 | 20.56 | 19896.67 |
| 215 | Jalgaon      | 21.01 | 75.56 | 217 | 862.16  | 2326.00 | 19.35 | 23.42 | 20949.17 |
| 216 | Jalore       | 25.34 | 72.63 | 176 | 897.60  | 2159.10 | 18.08 | 22.03 | 19461.67 |
| 217 | Jambugoda    | 22.36 | 73.73 | 93  | 844.54  | 2133.60 | 17.24 | 21.81 | 20396.67 |
| 218 | Jaminia      | 22.12 | 80.18 | 370 | 883.90  | 1884.05 | 15.54 | 19.73 | 20711.67 |
| 219 | Jamnagar     | 22.47 | 70.06 | 17  | 864.89  | 2114.80 | 17.38 | 21.66 | 20445.83 |
| 220 | Jamner       | 20.81 | 75.78 | 250 | 423.25  | 1217.20 | 19.74 | 24.02 | 20434.43 |
| 221 | Jamshedpur   | 22.80 | 86.20 | 148 | 925.79  | 2077.80 | 17.74 | 21.35 | 20349.17 |
| 222 | Jamunia      | 25.37 | 87.05 | 34  | 883.90  | 1884.05 | 15.54 | 19.73 | 20711.67 |
| 223 | Janakpur     | 23.43 | 81.49 | 405 | 905.01  | 1887.25 | 15.78 | 19.76 | 20137.50 |
| 224 | Janjgir      | 22.01 | 82.57 | 259 | 938.14  | 2197.00 | 18.93 | 22.34 | 20117.50 |
| 225 | Jaora        | 23.64 | 75.13 | 471 | 906.82  | 2121.60 | 17.79 | 21.71 | 20025.83 |
| 226 | Jashpurnagar | 22.89 | 84.14 | 768 | 871.78  | 1644.80 | 14.03 | 17.74 | 20040.83 |
| 227 | Jaso         | 24.50 | 80.52 | 330 | 903.94  | 1903.20 | 16.24 | 19.89 | 19546.67 |
| 228 | Jaswantpura  | 24.80 | 72.46 | 278 | 849.04  | 2176.15 | 18.22 | 22.17 | 19776.67 |
| 229 | Jayankoundam | 11.21 | 79.36 | 52  | 491.89  | 1308.80 | 21.90 | 24.51 | 20546.88 |
| 230 | Jeypore      | 18.86 | 82.55 | 584 | 967.72  | 1987.60 | 17.31 | 20.60 | 20666.67 |
| 231 | Jhaiawar     | 24.60 | 76.16 | 315 | 839.16  | 1946.70 | 15.72 | 20.26 | 19695.83 |
| 232 | Jhansi       | 25.45 | 78.57 | 250 | 680.96  | 1398.00 | 15.26 | 19.24 | 19184.78 |
| 233 | Jharsuguda   | 21.86 | 84.01 | 217 | 736.18  | 1676.60 | 17.02 | 20.98 | 20651.52 |
| 234 | Joypur       | 23.06 | 87.45 | 53  | 751.49  | 1730.75 | 17.81 | 21.52 | 20045.45 |

|     |              |       |       |     |        |         |       |       |          |
|-----|--------------|-------|-------|-----|--------|---------|-------|-------|----------|
| 235 | Junagarh     | 21.52 | 70.46 | 82  | 899.10 | 2219.60 | 18.78 | 22.53 | 20826.67 |
| 236 | Kaira        | 22.45 | 72.42 | 36  | 834.76 | 2250.15 | 18.21 | 22.78 | 20525.00 |
| 237 | Kakinada     | 16.99 | 82.25 | 7   | 358.23 | 939.15  | 21.75 | 24.50 | 20226.09 |
| 238 | Kalana       | 28.50 | 75.30 | 256 | 866.19 | 2212.15 | 18.44 | 22.47 | 20327.50 |
| 239 | Kalol        | 22.61 | 73.46 | 74  | 866.26 | 2168.15 | 17.76 | 22.10 | 20116.67 |
| 240 | Kalvan       | 18.29 | 73.27 | 40  | 970.30 | 2033.15 | 17.85 | 20.98 | 19535.00 |
| 241 | Kalyanganj   | 27.14 | 76.25 | 388 | 898.74 | 2103.85 | 17.76 | 21.57 | 20213.33 |
| 242 | Kammareddi   | 18.32 | 78.33 | 509 | 761.00 | 1843.95 | 18.84 | 22.48 | 20448.00 |
| 243 | Kanas        | 20.00 | 85.65 | 12  | 703.05 | 1910.40 | 20.66 | 23.94 | 20343.75 |
| 244 | Kandi        | 23.95 | 88.05 | 19  | 899.05 | 2110.95 | 17.81 | 21.62 | 20170.83 |
| 245 | Kanekal      | 14.81 | 77.07 | 457 | 634.96 | 1778.55 | 21.37 | 24.49 | 21341.38 |
| 246 | Kanker       | 20.27 | 81.49 | 384 | 896.19 | 1929.85 | 16.76 | 20.53 | 20638.46 |
| 247 | Kankey       | 23.30 | 85.18 | 621 | 935.36 | 1782.80 | 15.55 | 18.89 | 19594.17 |
| 248 | Kanki        | 26.01 | 87.86 | 32  | 867.81 | 1997.65 | 18.13 | 21.71 | 20422.12 |
| 249 | Kannod       | 22.66 | 76.74 | 326 | 450.67 | 1284.05 | 17.60 | 22.67 | 20994.20 |
| 250 | Kapadvanj    | 23.02 | 73.07 | 77  | 857.15 | 2216.15 | 18.10 | 22.50 | 20303.33 |
| 251 | Karimnagar   | 18.44 | 79.13 | 266 | 640.88 | 1687.80 | 20.21 | 23.67 | 20802.33 |
| 252 | Karmala      | 18.40 | 75.19 | 555 | 432.29 | 1122.45 | 18.01 | 22.47 | 21239.34 |
| 253 | Katangi      | 21.77 | 79.80 | 338 | 912.90 | 2162.40 | 18.20 | 22.05 | 20739.17 |
| 254 | Katol        | 21.27 | 78.59 | 404 | 920.53 | 2143.75 | 18.05 | 21.90 | 20880.00 |
| 255 | Kattan Jhiri | 21.50 | 79.59 | 334 | 908.51 | 2173.85 | 18.42 | 22.15 | 20762.50 |
| 256 | Katwa        | 23.64 | 88.13 | 8   | 899.42 | 2096.95 | 17.58 | 21.51 | 20548.33 |
| 257 | Kawardha     | 22.01 | 81.22 | 360 | 931.99 | 2097.45 | 18.01 | 21.51 | 20245.00 |
| 258 | Kendri       | 21.10 | 81.74 | 315 | 918.46 | 2183.90 | 18.61 | 22.23 | 20544.17 |
| 259 | Keolari      | 22.37 | 79.91 | 440 | 952.33 | 2049.75 | 17.54 | 21.11 | 20320.83 |
| 260 | Keonjargarh  | 21.62 | 85.59 | 492 | 931.53 | 1829.50 | 15.86 | 19.28 | 20095.00 |
| 261 | keshiary     | 22.12 | 87.23 | 36  | 868.35 | 2225.35 | 19.30 | 22.89 | 20573.73 |
| 262 | Keskal       | 20.08 | 81.59 | 641 | 908.86 | 1694.25 | 14.68 | 18.15 | 20407.50 |
| 263 | khachord     | 23.42 | 75.28 | 492 | 919.38 | 2058.55 | 17.39 | 21.19 | 19682.50 |
| 264 | Khaira       | 21.49 | 86.95 | 12  | 695.89 | 1815.15 | 18.59 | 22.75 | 20611.34 |
| 265 | Khairagarh   | 21.42 | 80.98 | 309 | 904.76 | 2047.70 | 17.93 | 21.54 | 20408.55 |
| 266 | Khamagaon    | 20.71 | 76.57 | 299 | 658.58 | 1873.70 | 20.54 | 24.19 | 20651.61 |
| 267 | Khamaria     | 21.80 | 81.33 | 294 | 878.03 | 2081.75 | 17.84 | 21.83 | 20823.93 |
| 268 | Khanakul     | 22.73 | 87.87 | 10  | 874.75 | 2201.10 | 18.69 | 22.38 | 20375.00 |

|     |            |       |       |     |        |         |       |       |          |
|-----|------------|-------|-------|-----|--------|---------|-------|-------|----------|
| 269 | Khandwa    | 21.83 | 76.35 | 304 | 725.04 | 1814.95 | 17.63 | 22.01 | 20427.72 |
| 270 | Khanpur    | 23.03 | 72.58 | 55  | 890.58 | 1955.45 | 16.13 | 20.33 | 19703.33 |
| 271 | Khapari    | 20.56 | 79.50 | 234 | 924.84 | 2177.85 | 18.56 | 22.18 | 20660.83 |
| 272 | Kharagpore | 22.35 | 87.23 | 45  | 579.94 | 1342.30 | 17.61 | 21.48 | 20194.81 |
| 273 | Khargram   | 24.03 | 87.98 | 22  | 893.39 | 2108.30 | 17.73 | 21.60 | 19870.00 |
| 274 | Kharra     | 21.30 | 81.19 | 286 | 939.54 | 2025.80 | 17.34 | 20.92 | 20719.17 |
| 275 | Kharswaan  | 22.78 | 85.83 | 198 | 933.54 | 1987.25 | 16.97 | 20.59 | 20311.67 |
| 276 | Khatra     | 22.97 | 86.85 | 126 | 935.01 | 2045.90 | 17.58 | 21.08 | 20296.67 |
| 277 | Kherwara   | 23.84 | 73.48 | 325 | 938.55 | 1962.35 | 16.80 | 20.39 | 19561.67 |
| 278 | Khilchipur | 24.04 | 76.58 | 384 | 925.95 | 2112.70 | 17.82 | 21.64 | 20841.67 |
| 279 | Khitoli    | 26.39 | 78.52 | 145 | 900.25 | 1891.75 | 16.00 | 19.80 | 19784.17 |
| 280 | Kholapur   | 16.70 | 74.24 | 561 | 887.21 | 2192.65 | 18.30 | 22.31 | 20875.83 |
| 281 | Khowai     | 24.07 | 91.61 | 14  | 555.87 | 1232.20 | 16.27 | 20.48 | 19417.33 |
| 282 | Khurai     | 24.04 | 78.33 | 441 | 952.65 | 2013.75 | 17.28 | 20.81 | 19975.83 |
| 283 | Khurja     | 28.25 | 77.85 | 198 | 952.65 | 2013.75 | 17.28 | 20.81 | 19975.83 |
| 284 | Khyrburd   | 21.29 | 80.04 | 294 | 724.00 | 1769.05 | 18.31 | 22.28 | 20384.54 |
| 285 | Kolaghat   | 22.43 | 87.86 | 8   | 746.11 | 1789.90 | 18.47 | 22.12 | 20271.72 |
| 286 | Kondagaon  | 19.60 | 81.66 | 584 | 945.35 | 1957.80 | 16.69 | 20.35 | 21039.17 |
| 287 | Kondapar   | 21.00 | 81.72 | 302 | 805.16 | 1915.35 | 18.25 | 21.94 | 20575.70 |
| 288 | Konta      | 17.81 | 81.39 | 43  | 723.20 | 1723.00 | 20.04 | 22.98 | 21264.84 |
| 289 | Kopargaon  | 19.89 | 74.48 | 504 | 710.84 | 1837.95 | 17.99 | 22.42 | 20886.00 |
| 290 | Korapat    | 18.81 | 82.71 | 913 | 950.15 | 1787.25 | 15.80 | 18.93 | 20283.33 |
| 291 | Kotalpur   | 23.61 | 87.59 | 33  | 748.56 | 1753.15 | 18.06 | 21.75 | 20033.33 |
| 292 | Krishnagar | 23.40 | 88.50 | 10  | 921.59 | 2115.10 | 17.93 | 21.66 | 19980.00 |
| 293 | Kukrahati  | 22.18 | 88.12 | 7   | 593.94 | 1339.70 | 17.79 | 21.45 | 19976.62 |
| 294 | Kulpahar   | 25.31 | 79.64 | 188 | 823.73 | 1754.75 | 14.14 | 18.66 | 19509.17 |
| 295 | Kundahit   | 23.97 | 87.16 | 151 | 940.18 | 2000.50 | 17.18 | 20.70 | 19919.17 |
| 296 | Kurdeg     | 22.55 | 84.12 | 417 | 866.18 | 1902.90 | 17.47 | 21.03 | 20083.04 |
| 297 | Lakhnadon  | 22.60 | 79.60 | 615 | 907.62 | 1832.40 | 15.63 | 19.30 | 19823.33 |
| 298 | Lakholi    | 21.20 | 81.90 | 291 | 911.96 | 2213.85 | 18.87 | 22.48 | 20530.83 |
| 299 | Lakhpat    | 23.81 | 68.77 | 23  | 667.58 | 1826.05 | 20.25 | 23.89 | 19686.96 |
| 300 | Lalbagh    | 12.95 | 77.58 | 893 | 886.11 | 2063.85 | 17.44 | 21.23 | 19840.00 |
| 301 | Lalitpur   | 24.69 | 78.41 | 346 | 889.09 | 1813.35 | 15.13 | 19.14 | 19879.17 |
| 302 | Lanji      | 21.51 | 80.55 | 307 | 733.16 | 1736.05 | 18.02 | 21.94 | 20350.52 |

|     |                   |       |       |     |        |         |       |       |          |
|-----|-------------------|-------|-------|-----|--------|---------|-------|-------|----------|
| 303 | Latehar           | 23.75 | 84.51 | 379 | 883.07 | 1656.15 | 14.03 | 17.83 | 19878.33 |
| 304 | Lohardaga         | 23.44 | 84.68 | 651 | 929.70 | 1746.20 | 15.47 | 18.59 | 19620.83 |
| 305 | Madanapalli       | 13.56 | 78.50 | 688 | 990.59 | 2238.30 | 19.96 | 22.69 | 20080.00 |
| 306 | Madurantakam      | 12.51 | 79.88 | 27  | 355.17 | 955.20  | 22.22 | 24.85 | 20591.30 |
| 307 | Mahasamund        | 21.06 | 82.06 | 297 | 867.44 | 1992.75 | 18.07 | 21.67 | 20465.49 |
| 308 | Mahbubnagar       | 16.73 | 78.00 | 475 | 881.80 | 2255.40 | 20.35 | 23.48 | 20843.10 |
| 309 | Maheshwar         | 22.12 | 75.58 | 151 | 878.42 | 2118.55 | 17.79 | 21.69 | 19913.33 |
| 310 | Mahidpur          | 24.57 | 77.99 | 439 | 883.34 | 2002.30 | 16.49 | 20.72 | 20094.17 |
| 311 | Mahoba            | 25.29 | 79.37 | 199 | 820.77 | 1733.00 | 13.96 | 18.48 | 19512.50 |
| 312 | Mahrni            | 24.58 | 78.72 | 367 | 923.95 | 1944.70 | 16.59 | 20.24 | 19872.50 |
| 313 | Mahudha           | 22.81 | 72.94 | 39  | 815.22 | 2075.80 | 17.83 | 22.24 | 20400.88 |
| 314 | Maihar            | 24.26 | 80.75 | 344 | 691.28 | 1411.90 | 15.90 | 19.39 | 19327.17 |
| 315 | Majhgahan Hansraj | 24.91 | 80.80 | 330 | 949.01 | 1922.35 | 16.50 | 20.05 | 20175.83 |
| 316 | Makrai            | 22.06 | 77.10 | 372 | 929.42 | 1933.30 | 16.27 | 20.14 | 20480.83 |
| 317 | Mala              | 10.24 | 76.26 | 6   | 862.24 | 1974.45 | 16.24 | 20.49 | 20084.17 |
| 318 | Malda             | 25.02 | 88.14 | 33  | 936.26 | 2013.30 | 17.26 | 20.81 | 19420.83 |
| 319 | Malegaon          | 20.55 | 74.51 | 430 | 387.68 | 1014.00 | 16.14 | 21.55 | 21212.07 |
| 320 | Malkapur          | 20.88 | 76.21 | 242 | 431.71 | 1274.15 | 20.82 | 24.62 | 20209.68 |
| 321 | Malsiras          | 17.86 | 74.90 | 526 | 877.08 | 2383.25 | 20.44 | 23.89 | 20411.67 |
| 322 | Manchappa         | 13.12 | 77.91 | 884 | 911.37 | 2322.75 | 24.31 | 23.39 | 20591.67 |
| 323 | Mandhata          | 22.25 | 76.15 | 220 | 409.83 | 987.20  | 18.26 | 22.36 | 21074.07 |
| 324 | Mandla            | 22.59 | 80.37 | 436 | 845.11 | 1728.80 | 14.07 | 18.44 | 20563.33 |
| 325 | Mandsaur          | 24.07 | 75.06 | 441 | 876.04 | 1913.95 | 15.81 | 19.98 | 19833.33 |
| 326 | Mangalkot         | 23.52 | 87.90 | 25  | 927.28 | 2108.35 | 18.15 | 21.60 | 19946.67 |
| 327 | Mangrulpur        | 20.31 | 77.34 | 441 | 893.07 | 2159.70 | 18.08 | 22.03 | 20774.17 |
| 328 | Manikpur          | 25.02 | 81.10 | 234 | 851.44 | 1784.75 | 14.74 | 18.91 | 19545.00 |
| 329 | Mankar            | 23.42 | 87.55 | 63  | 753.62 | 1732.70 | 17.88 | 21.54 | 19935.35 |
| 330 | Manoharpur        | 27.30 | 75.95 | 450 | 940.80 | 2036.45 | 17.58 | 21.00 | 20053.33 |
| 331 | Manoharthana      | 24.53 | 76.17 | 312 | 745.40 | 1748.45 | 16.34 | 20.85 | 19610.58 |
| 332 | Manteswar         | 23.42 | 88.10 | 8   | 899.13 | 2113.80 | 17.75 | 21.65 | 20560.00 |
| 333 | Matar             | 22.70 | 72.65 | 27  | 835.51 | 2249.30 | 18.20 | 22.78 | 20532.50 |
| 334 | Mau               | 25.94 | 83.54 | 70  | 902.75 | 1855.85 | 15.46 | 19.50 | 19601.67 |
| 335 | Maul              | 25.94 | 83.54 | 64  | 865.71 | 1813.80 | 14.82 | 19.15 | 19618.33 |
| 336 | Mayureswar        | 23.98 | 87.76 | 42  | 749.92 | 1716.30 | 17.63 | 21.38 | 19879.80 |

|     |              |       |       |     |         |         |       |       |          |
|-----|--------------|-------|-------|-----|---------|---------|-------|-------|----------|
| 337 | Mehkar       | 20.14 | 76.57 | 542 | 778.31  | 1880.10 | 18.20 | 22.12 | 20420.19 |
| 338 | Mehmadabad   | 22.99 | 72.61 | 57  | 858.95  | 2182.95 | 17.82 | 22.22 | 20372.50 |
| 339 | Mehsana      | 23.58 | 72.36 | 77  | 654.41  | 1748.15 | 19.18 | 23.05 | 19993.48 |
| 340 | Mhaswad      | 17.63 | 74.78 | 606 | 765.70  | 1914.00 | 19.05 | 22.80 | 21399.02 |
| 341 | Mhow         | 22.55 | 75.75 | 589 | 841.74  | 1965.30 | 15.87 | 20.41 | 20456.67 |
| 342 | Midnapore    | 22.43 | 87.32 | 49  | 890.52  | 2182.95 | 18.51 | 22.22 | 20183.33 |
| 343 | Mirajgaon    | 18.73 | 75.02 | 566 | 606.43  | 1579.45 | 17.85 | 22.41 | 21168.60 |
| 344 | Modasa       | 23.46 | 73.29 | 144 | 909.17  | 2069.90 | 17.38 | 21.28 | 20110.83 |
| 345 | Mohana       | 22.71 | 75.85 | 532 | 1014.93 | 1997.15 | 18.17 | 20.68 | 19740.83 |
| 346 | Mokhada      | 19.93 | 73.34 | 393 | 968.67  | 2212.60 | 19.70 | 22.47 | 20341.67 |
| 347 | Molakalmuru  | 14.71 | 76.74 | 607 | 779.83  | 2071.70 | 21.38 | 24.15 | 20591.26 |
| 348 | Morsi        | 21.32 | 78.01 | 349 | 738.04  | 1879.70 | 18.94 | 22.84 | 20129.00 |
| 349 | Morvi        | 22.81 | 70.82 | 43  | 498.48  | 1426.90 | 18.46 | 23.08 | 20929.33 |
| 350 | Mulbangel    | 13.16 | 78.39 | 847 | 963.76  | 2200.70 | 19.29 | 20.65 | 19637.69 |
| 351 | Mungeli      | 22.06 | 81.68 | 288 | 915.15  | 2107.55 | 18.11 | 21.74 | 20255.46 |
| 352 | Murari       | 25.34 | 78.43 | 283 | 606.93  | 1579.65 | 17.97 | 22.20 | 20562.07 |
| 353 | Murtajapur   | 20.73 | 77.35 | 304 | 607.68  | 1617.40 | 18.50 | 22.85 | 20668.60 |
| 354 | Nadiad       | 22.69 | 72.86 | 32  | 657.38  | 1618.65 | 17.74 | 22.03 | 20113.33 |
| 355 | Nagarkarnool | 16.49 | 78.31 | 448 | 708.36  | 1783.40 | 20.29 | 23.43 | 20714.13 |
| 356 | Nagpur       | 21.14 | 79.08 | 301 | 901.61  | 2123.40 | 17.74 | 21.03 | 20416.13 |
| 357 | Nakhatrana   | 23.34 | 69.26 | 130 | 478.95  | 1207.50 | 17.86 | 22.08 | 19865.67 |
| 358 | Nalesar      | 20.03 | 79.28 | 213 | 895.86  | 2208.95 | 18.61 | 22.44 | 21029.17 |
| 359 | Nalhati      | 24.29 | 87.83 | 32  | 608.22  | 1582.35 | 18.05 | 22.23 | 20593.10 |
| 360 | Nandgaon     | 18.38 | 72.92 | 465 | 710.49  | 1817.85 | 17.15 | 21.86 | 21139.22 |
| 361 | Nandura      | 20.83 | 76.45 | 263 | 547.24  | 1571.05 | 20.92 | 24.46 | 20315.58 |
| 362 | Narajole     | 22.56 | 87.61 | 12  | 882.89  | 2199.10 | 18.69 | 22.36 | 20528.33 |
| 363 | Narasapatam  | 16.43 | 81.69 | 11  | 593.34  | 1519.35 | 21.43 | 24.04 | 19640.79 |
| 364 | Narayanganj  | 22.28 | 79.57 | 590 | 846.16  | 1736.25 | 14.13 | 18.50 | 20530.83 |
| 365 | Narayangarh  | 24.27 | 75.05 | 449 | 574.52  | 1316.20 | 18.06 | 21.84 | 19918.92 |
| 366 | Narayanpur   | 19.72 | 81.24 | 528 | 899.47  | 1984.10 | 16.64 | 20.57 | 20915.83 |
| 367 | Narsingarh   | 23.71 | 77.08 | 517 | 925.85  | 1996.75 | 16.72 | 20.67 | 20155.00 |
| 368 | Narsinhpur   | 21.1  | 77.84 | 333 | 935.13  | 2093.40 | 17.75 | 21.48 | 20253.33 |
| 369 | Navapur      | 21.16 | 73.79 | 132 | 867.10  | 2074.00 | 16.98 | 21.32 | 20934.17 |
| 370 | Navipet      | 18.77 | 78.01 | 360 | 869.99  | 2319.05 | 20.13 | 23.69 | 20710.17 |



|     |              |       |       |      |         |         |       |       |          |
|-----|--------------|-------|-------|------|---------|---------|-------|-------|----------|
| 371 | Neemuch      | 24.47 | 74.86 | 483  | 885.77  | 1839.10 | 15.36 | 19.36 | 19623.33 |
| 372 | Ner          | 20.49 | 77.86 | 333  | 617.69  | 1618.15 | 18.69 | 22.86 | 20653.49 |
| 373 | Nevasa       | 19.55 | 74.92 | 469  | 713.87  | 1855.35 | 18.27 | 22.59 | 20906.00 |
| 374 | Nimbahera    | 24.62 | 74.68 | 440  | 893.62  | 1955.15 | 16.12 | 20.33 | 19850.83 |
| 375 | Nirmal       | 19.09 | 78.34 | 325  | 641.60  | 1648.85 | 19.59 | 23.22 | 20766.28 |
| 376 | Nithawa      | 23.55 | 74.18 | 220  | 858.24  | 2129.55 | 17.38 | 21.78 | 20072.50 |
| 377 | Niwas        | 23.04 | 80.44 | 653  | 881.23  | 1642.50 | 13.95 | 17.72 | 19946.67 |
| 378 | Nizamabad    | 18.67 | 78.09 | 395  | 876.28  | 2313.15 | 20.12 | 23.64 | 20684.75 |
| 379 | Nowgong      | 25.06 | 79.43 | 229  | 847.03  | 1779.35 | 14.43 | 18.86 | 19675.83 |
| 380 | Onda         | 23.13 | 87.2  | 70   | 909.98  | 2131.40 | 18.11 | 21.80 | 20109.17 |
| 381 | Pachhar      | 24.63 | 76.72 | 318  | 897.89  | 1823.60 | 15.17 | 19.23 | 19584.17 |
| 382 | Pachmarhi    | 22.46 | 78.43 | 1067 | 825.31  | 1537.55 | 12.98 | 16.85 | 20115.00 |
| 383 | Pachwara     | 25.37 | 79.05 | 208  | 867.25  | 1808.65 | 14.83 | 19.11 | 19586.67 |
| 384 | Palakonda    | 18.6  | 83.75 | 37   | 642.80  | 1690.45 | 20.89 | 23.93 | 20728.24 |
| 385 | Palamau      | 24.03 | 84.07 | 218  | 910.61  | 1811.30 | 15.19 | 19.13 | 19595.00 |
| 386 | Palanpur     | 24.17 | 72.43 | 222  | 829.08  | 2092.40 | 16.65 | 21.47 | 20034.17 |
| 387 | Palasdanga   | 24.61 | 87.8  | 48   | 912.09  | 2126.05 | 18.10 | 21.75 | 20013.33 |
| 388 | Palhera      | 22.05 | 80.76 | 565  | 880.26  | 1983.65 | 16.43 | 20.56 | 20379.17 |
| 389 | Panderkowra  | 20.1  | 78.33 | 247  | 611.97  | 1720.30 | 20.30 | 24.05 | 20516.28 |
| 390 | Pangree      | 19.81 | 74.2  | 570  | 672.72  | 1818.15 | 18.57 | 22.79 | 21009.28 |
| 391 | Panskura     | 22.39 | 87.74 | 5    | 746.88  | 1785.80 | 18.41 | 22.08 | 20290.91 |
| 392 | Paraswada    | 22.17 | 80.29 | 576  | 879.11  | 1806.00 | 15.15 | 19.08 | 20123.33 |
| 393 | Parbhani     | 19.26 | 76.77 | 412  | 674.74  | 1720.50 | 18.74 | 22.74 | 21015.22 |
| 394 | Partabgarh   | 25.89 | 81.94 | 88   | 878.75  | 1922.00 | 15.95 | 20.05 | 19765.00 |
| 395 | Parvatipuram | 18.78 | 83.42 | 119  | 700.45  | 1903.70 | 20.89 | 24.08 | 20911.58 |
| 396 | Patan2       | 23.18 | 79.42 | 375  | 861.40  | 1935.30 | 15.90 | 20.16 | 20195.83 |
| 397 | Patrasayar   | 23.19 | 87.54 | 46   | 750.81  | 1748.60 | 18.03 | 21.70 | 19981.82 |
| 398 | Patur        | 20.46 | 76.93 | 335  | 756.39  | 1910.20 | 19.25 | 22.95 | 20494.06 |
| 399 | Peint        | 20.25 | 73.5  | 604  | 979.41  | 2005.70 | 17.47 | 20.75 | 20945.00 |
| 400 | Pendra Road  | 22.75 | 81.89 | 602  | 926.17  | 1805.45 | 15.77 | 19.08 | 19778.33 |
| 401 | Perambalur   | 11.24 | 78.86 | 134  | 1050.37 | 1947.25 | 18.05 | 20.26 | 19426.67 |
| 402 | Pindraon     | 27    | 78.65 | 146  | 910.69  | 2209.20 | 18.81 | 22.44 | 20431.67 |
| 403 | Pinglaj      | 22.81 | 72.6  | 23   | 833.76  | 2257.15 | 18.27 | 22.84 | 20510.83 |
| 404 | Pirawa       | 24.16 | 76.03 | 376  | 908.33  | 1924.60 | 16.05 | 20.07 | 19781.67 |

|     |                  |       |       |     |        |         |       |       |          |
|-----|------------------|-------|-------|-----|--------|---------|-------|-------|----------|
| 405 | Pithora          | 21.25 | 82.51 | 288 | 927.79 | 2087.40 | 17.76 | 21.43 | 20766.67 |
| 406 | Polur            | 12.51 | 79.12 | 171 | 649.54 | 1336.25 | 18.71 | 21.41 | 21224.68 |
| 407 | Potkabari        | 23.52 | 88.27 | 15  | 565.27 | 1255.25 | 16.94 | 21.02 | 19678.38 |
| 408 | Prantij          | 23.43 | 72.85 | 118 | 873.62 | 2112.95 | 17.30 | 21.64 | 20068.33 |
| 409 | Pudukkottai      | 10.37 | 78.82 | 95  | 429.87 | 1151.20 | 21.93 | 24.63 | 20791.07 |
| 410 | Purnea           | 25.77 | 87.47 | 35  | 880.70 | 1886.00 | 15.81 | 19.75 | 19513.33 |
| 411 | Purulia          | 23.33 | 86.36 | 257 | 917.55 | 2015.60 | 17.27 | 20.83 | 19938.33 |
| 412 | Radhanpur        | 23.82 | 71.61 | 27  | 686.56 | 1876.65 | 18.14 | 22.81 | 19777.00 |
| 413 | Raiganj          | 25.61 | 88.12 | 28  | 900.82 | 1934.95 | 16.42 | 20.16 | 19533.33 |
| 414 | Raipur           | 21.25 | 81.62 | 302 | 924.21 | 2125.85 | 18.21 | 21.75 | 20315.00 |
| 415 | Raipur 2         | 21.07 | 78.96 | 294 | 866.45 | 1998.15 | 18.12 | 21.72 | 20448.67 |
| 416 | Rajakhera        | 26.89 | 78.17 | 155 | 803.90 | 1694.25 | 15.60 | 19.44 | 19374.55 |
| 417 | Rajgarh          | 24    | 76.72 | 370 | 716.90 | 1754.70 | 17.08 | 21.59 | 19545.00 |
| 418 | Rajim            | 20.96 | 81.89 | 276 | 760.41 | 1841.80 | 18.34 | 22.10 | 20781.37 |
| 419 | Rajkot           | 22.3  | 70.8  | 126 | 857.15 | 2244.35 | 18.62 | 22.74 | 20592.50 |
| 420 | Rajnandgaon      | 21.09 | 81.03 | 307 | 817.42 | 1888.60 | 17.81 | 21.52 | 20762.96 |
| 421 | Rajnigiri        | 21.27 | 86.46 | 545 | 945.51 | 1749.00 | 15.37 | 18.61 | 19994.17 |
| 422 | Rajpipla         | 21.87 | 73.5  | 45  | 438.87 | 1262.80 | 19.94 | 24.11 | 20403.17 |
| 423 | Ramachandrapuram | 16.83 | 82.03 | 10  | 372.43 | 1014.80 | 22.15 | 24.79 | 19638.78 |
| 424 | Ramgarh1         | 23.38 | 85.31 | 335 | 956.66 | 1989.40 | 17.21 | 20.61 | 19941.67 |
| 425 | Rampurhat        | 24.18 | 87.78 | 33  | 885.95 | 2117.50 | 17.91 | 21.83 | 19950.42 |
| 426 | Ramtek           | 21.39 | 79.32 | 319 | 783.47 | 1819.00 | 17.55 | 21.53 | 20361.54 |
| 427 | Ranaghat         | 23.17 | 88.56 | 9   | 854.70 | 2167.20 | 18.17 | 22.25 | 20542.02 |
| 428 | Ranibandh        | 22.86 | 86.78 | 169 | 902.47 | 2019.70 | 17.16 | 20.86 | 20274.17 |
| 429 | Rasra            | 25.85 | 83.85 | 58  | 577.08 | 1259.20 | 15.12 | 19.14 | 19203.33 |
| 430 | Raver            | 21.24 | 76.03 | 229 | 751.64 | 1927.45 | 18.44 | 22.57 | 20648.08 |
| 431 | Rayaguda         | 18.17 | 80.63 | 62  | 421.06 | 1117.05 | 20.83 | 24.02 | 20966.07 |
| 432 | Rehli            | 23.63 | 79.06 | 402 | 957.87 | 1948.35 | 16.80 | 20.27 | 20144.17 |
| 433 | Rewa             | 24.53 | 81.3  | 295 | 684.78 | 1419.20 | 16.17 | 19.64 | 19286.81 |
| 434 | Robertaganj      | 24.68 | 83.06 | 311 | 878.27 | 1858.95 | 15.46 | 19.52 | 19408.33 |
| 435 | Roha             | 18.43 | 73.11 | 9   | 451.12 | 1326.90 | 22.16 | 25.13 | 21180.95 |
| 436 | Roomal           | 22.31 | 80.07 | 368 | 861.47 | 1985.25 | 16.21 | 20.58 | 20626.67 |
| 437 | Rudri            | 20.66 | 81.55 | 321 | 702.12 | 1659.35 | 17.62 | 21.70 | 20635.11 |
| 438 | Sabroom          | 23    | 91.71 | 18  | 677.02 | 1574.15 | 18.64 | 22.14 | 20540.23 |

|     |              |       |       |     |        |         |       |       |          |
|-----|--------------|-------|-------|-----|--------|---------|-------|-------|----------|
| 439 | sachor       | 24.75 | 71.77 | 57  | 843.42 | 2173.45 | 17.65 | 22.15 | 19922.50 |
| 440 | Sachour      | 24.75 | 71.77 | 57  | 843.42 | 2173.45 | 17.65 | 22.15 | 19922.50 |
| 441 | Sagar        | 23.83 | 78.73 | 530 | 957.81 | 1975.70 | 17.37 | 20.50 | 19605.83 |
| 442 | Sagardighi   | 24.29 | 88.08 | 28  | 904.30 | 2072.90 | 17.49 | 21.31 | 19973.33 |
| 443 | Sagwara      | 23.66 | 74.02 | 157 | 492.01 | 1422.40 | 18.16 | 23.02 | 20258.67 |
| 444 | Sailana      | 23.45 | 74.92 | 543 | 448.84 | 1266.00 | 20.32 | 24.16 | 19712.70 |
| 445 | Sakoli       | 21.08 | 79.99 | 243 | 489.18 | 1314.25 | 18.58 | 22.83 | 21044.29 |
| 446 | Sakti        | 22.02 | 82.96 | 231 | 860.62 | 2163.15 | 18.91 | 22.68 | 20301.72 |
| 447 | Saleteka     | 21.61 | 79.93 | 275 | 935.87 | 2143.00 | 18.40 | 21.89 | 20142.50 |
| 448 | Sallopat     | 23.18 | 74.16 | 238 | 857.00 | 2141.00 | 17.47 | 21.88 | 20231.67 |
| 449 | Saltora      | 23.52 | 86.93 | 153 | 728.83 | 1698.65 | 18.22 | 21.92 | 19668.42 |
| 450 | Sambalpur    | 21.46 | 83.98 | 155 | 731.18 | 1789.80 | 18.28 | 22.12 | 20517.17 |
| 451 | Sanand       | 22.99 | 72.37 | 34  | 864.47 | 2159.50 | 17.65 | 22.03 | 20324.17 |
| 452 | Sangareddy   | 17.61 | 78.08 | 513 | 905.31 | 2258.60 | 19.95 | 23.17 | 20847.46 |
| 453 | Sangod       | 24.92 | 76.28 | 271 | 881.41 | 1991.15 | 16.36 | 20.63 | 19861.67 |
| 454 | Saoner       | 21.38 | 78.92 | 320 | 885.05 | 2209.20 | 18.54 | 22.44 | 20600.83 |
| 455 | Saranga      | 23.14 | 87.75 | 34  | 753.11 | 1723.25 | 17.83 | 21.45 | 20123.23 |
| 456 | Sarangarh    | 21.58 | 83.07 | 223 | 775.08 | 1806.70 | 17.81 | 21.58 | 20763.11 |
| 457 | Sarathi      | 14.6  | 75.81 | 521 | 856.72 | 2152.95 | 17.82 | 21.97 | 20434.17 |
| 458 | Sardarpur    | 22.66 | 74.97 | 511 | 718.30 | 1711.65 | 18.43 | 22.06 | 20205.26 |
| 459 | Saswad       | 18.35 | 74.03 | 765 | 750.66 | 1744.95 | 16.41 | 20.82 | 20840.38 |
| 460 | Satana       | 20.59 | 74.2  | 559 | 865.40 | 2097.85 | 17.17 | 21.52 | 20971.67 |
| 461 | Sattenapalli | 16.39 | 80.15 | 70  | 575.71 | 1641.30 | 21.33 | 24.57 | 21265.00 |
| 462 | Satyavedu    | 13.43 | 79.96 | 35  | 437.75 | 1197.10 | 21.91 | 24.71 | 21079.31 |
| 463 | Sausar       | 21.65 | 78.79 | 350 | 903.81 | 2137.00 | 17.99 | 21.84 | 20535.83 |
| 464 | Savli Tank   | 22.56 | 73.22 | 44  | 692.63 | 1827.80 | 17.56 | 22.32 | 20250.00 |
| 465 | Selod        | 21.66 | 73.15 | 26  | 894.02 | 2048.75 | 17.81 | 21.54 | 20835.90 |
| 466 | Seoni        | 22.08 | 79.54 | 602 | 866.16 | 2098.10 | 17.20 | 21.52 | 20657.50 |
| 467 | Serampore    | 22.74 | 88.33 | 6   | 575.89 | 1319.30 | 17.20 | 21.19 | 20093.51 |
| 468 | Shahabad1    | 30.15 | 76.86 | 256 | 825.26 | 1813.50 | 14.56 | 19.15 | 19443.33 |
| 469 | Shahpura     | 23.18 | 80.7  | 648 | 644.00 | 1182.50 | 12.84 | 16.90 | 19597.83 |
| 470 | Shajapur     | 23.42 | 76.27 | 443 | 902.12 | 1992.35 | 16.73 | 20.64 | 19936.67 |
| 471 | Shegaon      | 20.79 | 76.69 | 276 | 490.87 | 1272.50 | 20.87 | 23.95 | 19915.63 |
| 472 | Sheoganj     | 25.14 | 73.06 | 271 | 939.96 | 2134.05 | 18.29 | 21.82 | 19439.17 |

|     |                       |       |       |     |         |         |       |       |          |
|-----|-----------------------|-------|-------|-----|---------|---------|-------|-------|----------|
| 473 | Shergarh1 (punjab)    | 30.08 | 74.94 | 198 | 881.75  | 2046.10 | 16.92 | 21.08 | 20000.00 |
| 474 | Sholapur              | 17.65 | 75.9  | 466 | 428.59  | 1048.40 | 20.36 | 23.49 | 21087.04 |
| 475 | Shujalpur             | 23.38 | 76.71 | 448 | 894.21  | 2034.90 | 16.88 | 20.99 | 20049.17 |
| 476 | Sihora                | 23.48 | 80.1  | 384 | 928.26  | 1893.40 | 16.23 | 19.81 | 19899.17 |
| 477 | Silda                 | 22.61 | 86.81 | 106 | 933.73  | 2058.95 | 17.65 | 21.19 | 20357.50 |
| 478 | Silli                 | 23.34 | 85.85 | 237 | 925.41  | 2099.20 | 18.10 | 21.53 | 20035.00 |
| 479 | Simdega               | 22.61 | 84.49 | 433 | 931.14  | 1941.85 | 16.71 | 20.22 | 19930.00 |
| 480 | Simlapal              | 22.91 | 87.07 | 55  | 749.61  | 1744.55 | 17.93 | 21.66 | 20250.51 |
| 481 | Sindewahi             | 20.29 | 79.66 | 203 | 879.30  | 2130.10 | 18.20 | 22.09 | 20946.61 |
| 482 | Sinnar                | 19.85 | 74    | 680 | 860.43  | 2045.45 | 17.26 | 21.37 | 20480.51 |
| 483 | Sirohi                | 24.88 | 72.85 | 306 | 910.22  | 2157.45 | 18.30 | 22.01 | 19456.67 |
| 484 | Sironj                | 24.10 | 77.67 | 467 | 913.39  | 1920.15 | 16.09 | 20.03 | 19665.83 |
| 485 | Sirpur                | 21.34 | 74.87 | 160 | 899.67  | 2111.85 | 17.63 | 21.63 | 20854.17 |
| 486 | Sirsi                 | 14.61 | 74.84 | 608 | 1043.78 | 2147.80 | 19.75 | 21.93 | 19640.83 |
| 487 | Sirur                 | 16.09 | 75.78 | 537 | 505.36  | 1143.20 | 18.76 | 22.21 | 20715.87 |
| 488 | Sitamau               | 24.01 | 75.35 | 480 | 916.88  | 1885.60 | 15.83 | 19.75 | 19773.33 |
| 489 | Sohagpur              | 22.7  | 78.19 | 324 | 866.43  | 1802.95 | 14.99 | 19.06 | 20160.00 |
| 490 | Sonamukhi             | 23.3  | 87.41 | 49  | 755.02  | 1735.30 | 17.90 | 21.57 | 19964.65 |
| 491 | Sonamura              | 23.47 | 91.26 | 13  | 945.27  | 2175.60 | 18.63 | 22.16 | 20112.50 |
| 492 | Songadh               | 21.16 | 73.56 | 119 | 823.22  | 2383.75 | 19.81 | 23.90 | 20946.67 |
| 493 | Sonua                 | 22.57 | 85.46 | 266 | 943.50  | 1939.45 | 16.66 | 20.20 | 20365.00 |
| 494 | Srikakulam            | 18.29 | 83.89 | 15  | 599.14  | 1555.65 | 21.10 | 24.00 | 20182.05 |
| 495 | Srinivasapur          | 13.33 | 78.2  | 813 | 1007.24 | 2156.55 | 19.18 | 22.00 | 20430.00 |
| 496 | Srungavarapukota      | 18.11 | 83.13 | 87  | 623.59  | 1449.80 | 20.59 | 23.13 | 19463.16 |
| 497 | Surda                 | 22.55 | 86.44 | 113 | 706.71  | 1723.80 | 19.80 | 22.99 | 19737.36 |
| 498 | Susner                | 23.94 | 76.1  | 415 | 934.64  | 1957.95 | 16.84 | 20.35 | 19787.50 |
| 499 | Suvasra               | 24.06 | 75.65 | 462 | 877.35  | 1874.40 | 15.50 | 19.65 | 19853.33 |
| 500 | Talcher               | 20.95 | 85.21 | 77  | 559.49  | 1439.65 | 19.08 | 23.00 | 20942.11 |
| 501 | Talegaon              | 20.4  | 74.9  | 385 | 448.35  | 1211.90 | 20.46 | 23.93 | 20208.20 |
| 502 | Talegaon<br>Dhamdhera | 18.67 | 74.14 | 564 | 679.03  | 1673.75 | 18.16 | 22.24 | 20866.30 |
| 503 | Tallakulam            | 9.93  | 78.13 | 114 | 597.81  | 1506.80 | 21.34 | 23.88 | 19632.89 |
| 504 | Taloda                | 21.56 | 74.21 | 123 | 462.66  | 1430.15 | 20.79 | 24.78 | 20285.51 |
| 505 | Tamar                 | 23.05 | 85.65 | 248 | 937.31  | 2075.60 | 17.87 | 21.33 | 19986.67 |

|     |                |       |       |     |        |         |       |       |          |
|-----|----------------|-------|-------|-----|--------|---------|-------|-------|----------|
| 506 | Tamia          | 22.34 | 78.66 | 932 | 959.86 | 1871.70 | 16.11 | 19.63 | 20188.33 |
| 507 | Tarakeswar     | 22.88 | 88.01 | 5   | 855.32 | 2186.40 | 18.77 | 22.56 | 20541.53 |
| 508 | Tasgaon        | 17.02 | 74.6  | 577 | 741.98 | 1902.85 | 19.32 | 23.07 | 21403.00 |
| 509 | Telhara        | 21.02 | 76.84 | 270 | 789.23 | 2176.85 | 19.56 | 23.65 | 20933.33 |
| 510 | Tendukhera     | 23.39 | 79.53 | 393 | 905.45 | 2174.90 | 18.34 | 22.16 | 20472.50 |
| 511 | Teonthar       | 24.98 | 81.64 | 96  | 889.58 | 1766.40 | 14.82 | 18.75 | 19806.67 |
| 512 | Tharad         | 24.03 | 71.42 | 10  | 493.50 | 1311.40 | 16.62 | 21.78 | 20418.92 |
| 513 | Tharsa         | 21.22 | 79.38 | 263 | 903.03 | 2220.40 | 18.66 | 22.54 | 20945.00 |
| 514 | Tirora         | 21.4  | 79.93 | 276 | 786.82 | 1868.45 | 18.17 | 22.00 | 20441.35 |
| 515 | Tiruvannamalai | 12.22 | 79.07 | 168 | 561.17 | 1579.50 | 22.09 | 24.84 | 20889.47 |
| 516 | Tiruvur        | 17.1  | 80.6  | 98  | 718.98 | 2107.05 | 20.94 | 24.50 | 21046.60 |
| 517 | Titlagarh      | 20.28 | 83.14 | 212 | 751.36 | 1811.40 | 17.85 | 21.80 | 21160.78 |
| 518 | Tuni           | 17.35 | 82.54 | 24  | 378.92 | 1007.90 | 22.12 | 24.65 | 19244.90 |
| 519 | Udaipur        | 24.58 | 73.71 | 552 | 862.08 | 1793.60 | 14.71 | 18.98 | 19665.83 |
| 520 | Ujjain         | 23.17 | 75.78 | 489 | 885.63 | 1960.35 | 16.27 | 20.37 | 19945.00 |
| 521 | Uluberia       | 22.47 | 88.1  | 8   | 905.80 | 2186.80 | 18.76 | 22.26 | 19896.67 |
| 522 | Umaria         | 23.53 | 80.82 | 456 | 901.36 | 1839.75 | 15.52 | 19.36 | 19903.33 |
| 523 | Umarkhed       | 19.59 | 77.69 | 416 | 728.38 | 1836.25 | 17.82 | 22.22 | 21301.98 |
| 524 | Umrer          | 20.96 | 79.2  | 315 | 901.08 | 2171.80 | 18.44 | 22.13 | 20670.00 |
| 525 | Unchhera       | 24.38 | 80.79 | 327 | 899.83 | 1745.75 | 14.62 | 18.58 | 19765.83 |
| 526 | Viramgam       | 23.12 | 72.05 | 35  | 831.63 | 2278.75 | 18.48 | 23.02 | 20265.83 |
| 527 | Vishnupur      | 23.06 | 78.99 | 342 | 911.51 | 2125.25 | 18.07 | 21.74 | 20105.00 |
| 528 | Wadhawan       | 22.42 | 71.4  | 76  | 852.47 | 2184.65 | 17.87 | 22.24 | 20450.83 |
| 529 | Waghai         | 20.77 | 73.49 | 140 | 906.83 | 2228.85 | 19.17 | 22.61 | 20540.83 |
| 530 | Wanghroli Tank | 22.53 | 73.19 | 72  | 611.62 | 1621.45 | 17.73 | 22.47 | 20215.91 |
| 531 | Wani           | 20.06 | 78.95 | 211 | 441.80 | 1007.70 | 19.56 | 22.74 | 21140.74 |
| 532 | Wankaner       | 22.62 | 70.95 | 77  | 371.24 | 1069.85 | 18.23 | 23.18 | 21441.07 |
| 533 | Wara-Main      | 21.37 | 80.24 | 305 | 909.53 | 2036.70 | 17.88 | 21.44 | 20296.58 |
| 534 | Waraseoni      | 21.76 | 80.05 | 305 | 568.70 | 1271.45 | 18.16 | 21.71 | 20586.11 |
| 535 | Wardha         | 20.74 | 78.6  | 274 | 614.45 | 1718.70 | 20.32 | 24.03 | 20386.05 |
| 536 | Washim         | 20.11 | 77.13 | 541 | 900.30 | 2070.75 | 17.31 | 21.29 | 20870.00 |
| 537 | Yaval          | 21.16 | 75.69 | 219 | 468.41 | 1149.20 | 18.26 | 22.30 | 20820.63 |
| 538 | Yelgattor      | 18.55 | 78.25 | 315 | 850.00 | 2323.30 | 20.30 | 23.89 | 20664.10 |
| 539 | Yeotmal        | 20.23 | 78.08 | 456 | 770.24 | 1823.00 | 19.27 | 22.64 | 20794.90 |

|     |          |       |      |      |        |         |       |       |          |
|-----|----------|-------|------|------|--------|---------|-------|-------|----------|
| 540 | Yeracaud | 11.77 | 78.2 | 1407 | 968.92 | 2212.65 | 19.77 | 22.47 | 19848.33 |
|-----|----------|-------|------|------|--------|---------|-------|-------|----------|

**Class #4 (Locations: 23)**

| Sr No | Station          | Lat   | Long  | Alt | P days (7,21,30) | GDD (4 deg C base temp) | Mean Night temp | Mean T | Mean radn (Kj/day/m2) |
|-------|------------------|-------|-------|-----|------------------|-------------------------|-----------------|--------|-----------------------|
| 1     | Amari            | 29.94 | 78.52 | 900 | 623.15           | 1493.60                 | 17.63           | 21.21  | 14217.24              |
| 2     | Amritsar         | 31.63 | 74.87 | 229 | 623.15           | 1493.60                 | 17.63           | 21.21  | 14217.24              |
| 3     | Amritsara        | 31.63 | 74.87 | 229 | 624.16           | 1495.25                 | 17.69           | 21.23  | 14143.68              |
| 4     | Amroha           | 28.90 | 78.46 | 217 | 488.45           | 1312.90                 | 19.24           | 22.87  | 15501.43              |
| 5     | Buxaduar         | 26.46 | 89.35 | 752 | 928.68           | 1653.15                 | 15.06           | 17.81  | 14739.17              |
| 6     | Dharamsala Upper | 32.11 | 76.28 | 702 | 691.15           | 1593.45                 | 17.31           | 20.81  | 13845.26              |
| 7     | Fazilka          | 30.40 | 74.03 | 182 | 574.45           | 1514.45                 | 17.46           | 21.66  | 15347.67              |
| 8     | Ferozpur City    | 30.93 | 74.62 | 188 | 597.00           | 1486.95                 | 17.39           | 21.34  | 15215.12              |
| 9     | Haflong          | 25.16 | 93.01 | 656 | 924.55           | 1664.00                 | 14.95           | 17.90  | 14397.50              |
| 10    | Jaimalwala       | 30.75 | 75.04 | 216 | 598.44           | 1478.65                 | 17.27           | 21.24  | 15218.60              |
| 11    | Jalalabada       | 30.36 | 74.15 | 184 | 583.36           | 1514.25                 | 17.59           | 21.65  | 15251.16              |
| 12    | Mandangad        | 17.98 | 73.26 | 240 | 654.28           | 1282.65                 | 19.29           | 21.39  | 15025.68              |
| 13    | Moga             | 30.81 | 75.17 | 225 | 596.72           | 1479.90                 | 17.23           | 21.25  | 15259.30              |
| 14    | Muktesar         | 30.47 | 74.51 | 197 | 587.33           | 1496.40                 | 17.37           | 21.45  | 15319.77              |
| 15    | Nagamangala      | 12.82 | 76.25 | 771 | 798.15           | 1757.90                 | 21.23           | 23.15  | 14432.61              |
| 16    | Nagode           | 24.57 | 80.57 | 320 | 848.98           | 1781.10                 | 14.68           | 14.25  | 14938.36              |
| 17    | Nathana          | 30.31 | 75.09 | 213 | 585.36           | 1521.95                 | 17.69           | 21.74  | 15344.19              |
| 18    | Pandavapura      | 12.49 | 76.66 | 728 | 799.78           | 1752.30                 | 21.15           | 23.09  | 14523.91              |
| 19    | Raya             | 29.81 | 75.11 | 202 | 626.37           | 1507.30                 | 17.91           | 21.37  | 13917.24              |
| 20    | Rupar            | 31.02 | 76.58 | 275 | 649.01           | 1607.60                 | 17.80           | 21.52  | 14896.74              |
| 21    | Taran-Taran      | 31.46 | 74.92 | 217 | 620.40           | 1490.90                 | 17.57           | 21.18  | 14274.71              |
| 22    | Yellapur         | 14.96 | 74.71 | 555 | 818.99           | 1714.90                 | 20.93           | 22.68  | 14073.91              |
| 23    | zirakpur         | 30.96 | 74.98 | 211 | 598.32           | 1483.65                 | 17.34           | 21.30  | 15275.58              |

**Class #5 (Locations: 17)**

| <b>Sr No</b> | <b>Station</b> | <b>Lat</b> | <b>Long</b> | <b>Alt</b> | <b>P days<br/>(7,21,30)</b> | <b>GDD (4 deg C base<br/>temp)</b> | <b>Mean Night temp</b> | <b>Mean T</b> | <b>Mean radn<br/>(Kj/day/m2)</b> |
|--------------|----------------|------------|-------------|------------|-----------------------------|------------------------------------|------------------------|---------------|----------------------------------|
| 1            | Ammathi        | 12.24      | 75.86       | 932        | 1127.02                     | 1935.95                            | 18.87                  | 20.17         | 7719.17                          |
| 2            | Belur          | 13.16      | 75.86       | 941        | 1077.77                     | 1912.50                            | 18.58                  | 19.97         | 7726.67                          |
| 3            | Bhagamandala   | 12.38      | 75.52       | 892        | 1113.37                     | 1941.15                            | 18.93                  | 20.21         | 7695.00                          |
| 4            | Chikmagalur    | 13.32      | 75.78       | 1036       | 1096.84                     | 1972.75                            | 18.85                  | 20.47         | 6539.17                          |
| 5            | Karike         | 12.44      | 75.42       | 335        | 1113.88                     | 1916.85                            | 18.50                  | 20.01         | 7914.17                          |
| 6            | Mahabaleshwar  | 17.93      | 73.64       | 1273       | 1020.57                     | 1574.15                            | 16.04                  | 17.15         | 6885.00                          |
| 7            | Mercara        | 12.42      | 75.73       | 1112       | 1061.40                     | 1710.50                            | 16.93                  | 18.29         | 7165.00                          |
| 8            | Mukteshwar     | 29.28      | 79.39       | 2311       | 895.38                      | 1503.35                            | 14.00                  | 10.97         | 7103.31                          |
| 9            | Murkhal        | 19.92      | 79.84       | 181        | 1107.22                     | 1933.10                            | 18.73                  | 16.56         | 7810.96                          |
| 10           | Nagerhole      | 12.12      | 76.15       | 859        | 748.16                      | 1348.35                            | 19.29                  | 20.70         | 8055.56                          |
| 11           | Napoklu        | 12.3       | 75.68       | 902        | 1079.01                     | 1965.50                            | 18.91                  | 20.41         | 8031.67                          |
| 12           | Pulingoth      | 12.2       | 75.34       | 919        | 1120.54                     | 1999.40                            | 19.26                  | 20.70         | 8346.67                          |
| 13           | Saklespur      | 12.94      | 75.78       | 900        | 1081.90                     | 1954.05                            | 18.77                  | 20.32         | 7477.50                          |
| 14           | Sanivarasanthi | 12.72      | 75.88       | 956        | 1107.61                     | 1949.70                            | 19.02                  | 20.28         | 7254.17                          |
| 15           | Simla          | 31.1       | 77.17       | 2184       | 823.65                      | 1316.15                            | 13.34                  | 15.00         | 7623.33                          |
| 16           | Sunticoppa     | 12.45      | 75.82       | 990        | 1122.18                     | 1994.75                            | 19.25                  | 20.66         | 7824.17                          |
| 17           | Virajpet       | 12.19      | 75.8        | 894        | 1086.64                     | 1788.05                            | 17.73                  | 18.93         | 7935.83                          |

**Class #6 (Locations: 12)**

| <b>Sr No</b> | <b>Station</b> | <b>Lat</b> | <b>Long</b> | <b>Alt</b> | <b>P days<br/>(7,21,30)</b> | <b>GDD (4 deg C base<br/>temp)</b> | <b>Mean Night<br/>temp</b> | <b>Mean T</b> | <b>Mean radn<br/>(Kj/day/m2)</b> |
|--------------|----------------|------------|-------------|------------|-----------------------------|------------------------------------|----------------------------|---------------|----------------------------------|
| 1            | Anamalais      | 10.67      | 77.00       | 282        | 984.53                      | 1606.50                            | 15.63                      | 17.42         | 9223.33                          |
| 2            | Anantnag       | 33.73      | 75.14       | 1589       | 701.08                      | 1514.20                            | 13.83                      | 16.65         | 9484.17                          |
| 3            | Balecove       | 11.59      | 76.05       | 924        | 1072.96                     | 1908.95                            | 18.32                      | 19.94         | 9651.67                          |
| 4            | Balehonnur     | 13.34      | 75.46       | 741        | 1072.96                     | 1908.95                            | 18.32                      | 19.94         | 9651.67                          |
| 5            | Darjeeling     | 27.04      | 88.26       | 2145       | 818.51                      | 1306.90                            | 13.28                      | 14.92         | 9490.00                          |
| 6            | Devala         | 11.47      | 76.38       | 890        | 1109.63                     | 2027.50                            | 19.25                      | 20.93         | 10221.67                         |
| 7            | Karmad         | 19.87      | 75.54       | 565        | 1114.44                     | 2076.45                            | 19.88                      | 21.34         | 9107.50                          |
| 8            | Koppa          | 13.53      | 75.36       | 765        | 1101.66                     | 1907.60                            | 18.38                      | 19.93         | 9664.17                          |
| 9            | Kulgam         | 33.64      | 75.02       | 1742       | 549.69                      | 1123.10                            | 14.76                      | 17.91         | 9760.49                          |
| 10           | Periyapatna    | 12.33      | 76.09       | 844        | 1121.22                     | 2091.20                            | 20.01                      | 21.46         | 8947.50                          |
| 11           | Shillong       | 25.57      | 91.89       | 1421       | 916.11                      | 1458.50                            | 14.39                      | 16.19         | 9508.33                          |
| 12           | Vantipore      | 33.53      | 74.54       | 1600       | 722.42                      | 1692.45                            | 17.68                      | 20.96         | 9534.00                          |



**Class #7 (Locations: 166)**

| Sr No | Station      | Lat   | Long  | Alt | P days<br>(7,21,30) | GDD (4 deg C base<br>temp) | Mean Night<br>temp | Mean T | Mean radn<br>(Kj/day/m2) |
|-------|--------------|-------|-------|-----|---------------------|----------------------------|--------------------|--------|--------------------------|
| 1     | Anantpur     | 25.11 | 75.85 | 295 | 505.16              | 1513.95                    | 21.21              | 24.79  | 21531.51                 |
| 2     | Anekal       | 12.71 | 77.69 | 913 | 975.66              | 2216.80                    | 19.45              | 22.51  | 21311.67                 |
| 3     | Armori       | 20.47 | 79.98 | 218 | 840.77              | 1977.45                    | 17.32              | 21.53  | 21268.14                 |
| 4     | Arsikere     | 13.31 | 76.25 | 802 | 660.26              | 1781.95                    | 19.85              | 23.63  | 23131.87                 |
| 5     | Attur        | 11.60 | 78.60 | 217 | 428.85              | 1326.00                    | 22.34              | 25.45  | 22343.55                 |
| 6     | Aundh        | 18.56 | 73.81 | 578 | 971.88              | 2102.35                    | 18.25              | 21.55  | 21334.17                 |
| 7     | Bagalkot     | 16.17 | 75.65 | 535 | 659.41              | 1842.55                    | 20.91              | 24.29  | 22136.26                 |
| 8     | Bagepalli    | 13.78 | 77.79 | 725 | 930.44              | 2315.95                    | 20.27              | 23.33  | 21177.50                 |
| 9     | Bangalore    | 12.97 | 77.59 | 900 | 902.69              | 2215.30                    | 19.48              | 22.81  | 21189.83                 |
| 10    | Bansgaon     | 26.54 | 83.34 | 68  | 513.01              | 1525.15                    | 19.33              | 23.86  | 22302.60                 |
| 11    | Baramati     | 18.18 | 74.16 | 564 | 698.42              | 1354.85                    | 18.06              | 22.19  | 21901.67                 |
| 12    | Barur        | 12.30 | 78.30 | 425 | 466.50              | 1277.45                    | 21.16              | 24.34  | 22252.38                 |
| 13    | Belgaum      | 15.84 | 74.49 | 770 | 885.85              | 2354.40                    | 20.60              | 23.82  | 22066.39                 |
| 14    | Bellary      | 15.13 | 76.92 | 447 | 499.86              | 1524.15                    | 21.20              | 24.93  | 21757.53                 |
| 15    | Bhivandi     | 19.25 | 73.09 | 9   | 488.89              | 1438.70                    | 20.91              | 24.61  | 21782.86                 |
| 16    | Bhongir      | 17.50 | 78.88 | 404 | 856.71              | 2235.30                    | 19.96              | 23.47  | 21480.87                 |
| 17    | Bhopalpatnam | 18.86 | 80.38 | 142 | 715.15              | 2110.35                    | 20.69              | 24.53  | 21388.35                 |
| 18    | Bhor         | 18.14 | 73.84 | 621 | 885.85              | 2354.40                    | 20.60              | 23.82  | 22066.39                 |
| 19    | Bijapur      | 16.83 | 75.71 | 609 | 772.65              | 1890.65                    | 18.71              | 22.39  | 21662.14                 |
| 20    | Bijawar      | 24.62 | 79.49 | 342 | 772.65              | 1890.65                    | 18.71              | 22.39  | 21662.14                 |
| 21    | Bolthan      | 20.19 | 74.10 | 586 | 884.49              | 2156.25                    | 17.85              | 22.00  | 21208.33                 |
| 22    | Brahmapuri   | 24.85 | 74.60 | 398 | 835.83              | 2016.30                    | 17.68              | 21.88  | 21209.73                 |
| 23    | Challakire   | 14.31 | 76.65 | 585 | 462.19              | 1275.20                    | 20.96              | 24.30  | 22284.13                 |
| 24    | Chandgad     | 15.95 | 74.19 | 702 | 948.64              | 2222.20                    | 19.36              | 22.55  | 22731.67                 |
| 25    | Chittor      | 13.22 | 79.10 | 306 | 707.61              | 1844.05                    | 20.90              | 23.87  | 22056.99                 |

|    |               |       |       |     |        |         |       |       |          |
|----|---------------|-------|-------|-----|--------|---------|-------|-------|----------|
| 26 | Chowsala      | 18.71 | 75.69 | 696 | 882.93 | 2198.85 | 18.21 | 22.36 | 21741.67 |
| 27 | Cuddahpah     | 14.47 | 78.82 | 124 | 376.83 | 1264.95 | 22.39 | 25.88 | 22141.38 |
| 28 | Dahivadi      | 17.70 | 74.54 | 732 | 913.93 | 2304.00 | 19.81 | 23.23 | 21719.17 |
| 29 | Davangire     | 14.47 | 75.92 | 588 | 904.59 | 2349.65 | 20.47 | 23.61 | 21296.67 |
| 30 | Denkanikottah | 12.53 | 77.79 | 863 | 738.64 | 1870.30 | 19.91 | 23.32 | 22493.81 |
| 31 | Devanhalli    | 13.24 | 77.71 | 903 | 889.51 | 2243.95 | 19.68 | 23.05 | 21346.61 |
| 32 | Dhamtari      | 20.70 | 81.55 | 308 | 786.93 | 1928.15 | 17.78 | 21.89 | 21224.07 |
| 33 | Dharamapuri   | 12.11 | 78.14 | 471 | 497.17 | 1488.65 | 21.62 | 25.02 | 22318.31 |
| 34 | Dharampur     | 20.54 | 73.18 | 79  | 560.18 | 1520.25 | 19.50 | 23.54 | 21639.74 |
| 35 | Dharwar       | 15.46 | 75.01 | 728 | 847.59 | 2303.05 | 19.05 | 23.23 | 22772.50 |
| 36 | Dhone         | 15.40 | 77.87 | 421 | 546.50 | 1668.10 | 21.28 | 24.90 | 22065.00 |
| 37 | Dodballapur   | 13.29 | 77.54 | 911 | 884.95 | 2258.60 | 19.80 | 23.17 | 21328.81 |
| 38 | Dohad         | 21.81 | 75.94 | 270 | 884.95 | 2258.60 | 19.80 | 23.17 | 21328.81 |
| 39 | Gadag         | 15.43 | 75.64 | 656 | 830.60 | 2293.00 | 20.37 | 23.97 | 21659.13 |
| 40 | Gaganbavada   | 16.54 | 73.83 | 614 | 637.47 | 1293.65 | 18.82 | 21.54 | 21516.22 |
| 41 | Gandhinlaj    | 16.23 | 74.35 | 642 | 419.40 | 1267.25 | 20.25 | 24.50 | 22393.55 |
| 42 | Goribindnur   | 13.61 | 77.52 | 684 | 942.76 | 2284.35 | 19.97 | 23.07 | 21304.17 |
| 43 | Gudiband      | 13.67 | 77.70 | 827 | 944.21 | 2253.70 | 19.65 | 22.81 | 21239.17 |
| 44 | Gulabgarh     | 30.58 | 76.86 | 298 | 838.29 | 1609.50 | 14.36 | 17.45 | 10929.17 |
| 45 | Hadagalli     | 15.02 | 75.93 | 520 | 397.83 | 1197.85 | 20.67 | 24.72 | 22503.45 |
| 46 | Haliyar       | 15.20 | 74.45 | 550 | 580.41 | 1481.10 | 19.84 | 23.29 | 22645.45 |
| 47 | Hanamkonda    | 18.01 | 79.56 | 265 | 729.66 | 1993.25 | 20.00 | 23.77 | 21365.35 |
| 48 | Hangal        | 14.77 | 75.13 | 586 | 849.48 | 2368.60 | 20.66 | 24.11 | 22644.07 |
| 49 | Harur         | 12.05 | 78.48 | 338 | 634.97 | 1847.40 | 21.67 | 24.80 | 21658.43 |
| 50 | Haveri        | 14.80 | 75.40 | 571 | 717.66 | 1886.75 | 19.86 | 23.49 | 22420.62 |
| 51 | Hindupur      | 13.82 | 77.50 | 629 | 421.89 | 1201.75 | 20.27 | 24.03 | 22478.33 |
| 52 | Hiriyur       | 13.94 | 76.62 | 596 | 565.82 | 1552.75 | 20.84 | 24.22 | 22312.99 |
| 53 | Holakhere     | 14.02 | 76.11 | 692 | 577.18 | 1499.50 | 19.90 | 23.53 | 22364.94 |
| 54 | Honnali       | 14.23 | 75.65 | 529 | 579.26 | 1483.40 | 19.69 | 23.32 | 22346.75 |

|    |                 |       |       |     |        |         |       |       |          |
|----|-----------------|-------|-------|-----|--------|---------|-------|-------|----------|
| 55 | Hosadurga       | 13.80 | 76.29 | 709 | 887.66 | 2245.70 | 19.77 | 23.23 | 22312.82 |
| 56 | Hosur           | 12.74 | 77.83 | 856 | 982.05 | 2132.25 | 18.81 | 21.80 | 21541.67 |
| 57 | Hubli           | 15.36 | 75.12 | 616 | 898.04 | 2345.25 | 20.35 | 23.58 | 21597.50 |
| 58 | Hudugur         | 13.64 | 77.57 | 685 | 633.10 | 1509.25 | 19.50 | 22.68 | 23159.26 |
| 59 | Indapur         | 18.11 | 75.03 | 508 | 855.62 | 2276.20 | 18.77 | 23.00 | 21841.67 |
| 60 | Islampur        | 26.25 | 88.20 | 55  | 886.48 | 2341.95 | 20.02 | 23.55 | 21255.00 |
| 61 | Jagdapur        | 19.07 | 82.01 | 559 | 930.54 | 2071.80 | 17.55 | 21.30 | 21148.33 |
| 62 | Jamkhed         | 18.74 | 75.31 | 591 | 387.98 | 1050.75 | 17.34 | 22.50 | 21940.35 |
| 63 | Jath            | 17.05 | 75.21 | 660 | 881.90 | 2204.20 | 19.55 | 23.04 | 21480.17 |
| 64 | Kadur           | 13.55 | 76.01 | 765 | 900.25 | 2222.05 | 19.60 | 23.03 | 22404.27 |
| 65 | Kalghatgi       | 15.19 | 74.97 | 557 | 664.66 | 1826.65 | 20.71 | 24.12 | 22448.35 |
| 66 | Kalyan          | 19.24 | 73.13 | 6   | 521.25 | 1658.00 | 21.73 | 25.31 | 21616.67 |
| 67 | Kanakapura      | 12.55 | 77.42 | 625 | 847.61 | 2272.15 | 20.33 | 23.79 | 22256.52 |
| 68 | Kapashi         | 16.33 | 74.28 | 565 | 683.90 | 1871.50 | 19.92 | 23.74 | 21904.21 |
| 69 | Karad           | 17.28 | 74.20 | 572 | 871.20 | 2338.70 | 20.08 | 23.69 | 22343.70 |
| 70 | Karjat          | 18.92 | 73.33 | 47  | 785.27 | 2304.15 | 21.17 | 24.61 | 21933.04 |
| 71 | Khairee         | 24.78 | 79.82 | 241 | 841.39 | 1978.45 | 17.34 | 21.54 | 21265.49 |
| 72 | Khandala        | 20.03 | 74.77 | 581 | 575.66 | 1397.30 | 18.32 | 22.20 | 21737.66 |
| 73 | Khed            | 17.72 | 73.40 | 18  | 509.03 | 1424.35 | 17.81 | 22.79 | 22381.58 |
| 74 | Kolar           | 13.14 | 78.13 | 837 | 949.89 | 2244.90 | 19.62 | 22.74 | 21333.33 |
| 75 | Kolhapur        | 16.70 | 74.24 | 561 | 823.52 | 2174.50 | 19.34 | 23.28 | 21905.31 |
| 76 | Kollegal        | 12.15 | 77.11 | 649 | 711.87 | 1919.15 | 20.49 | 23.83 | 21677.32 |
| 77 | Koratagere      | 13.52 | 77.24 | 742 | 725.52 | 1903.45 | 20.18 | 23.66 | 21907.22 |
| 78 | Koregaon        | 17.70 | 74.16 | 662 | 913.75 | 2301.20 | 19.82 | 23.21 | 22341.67 |
| 79 | Krishnarajnagar | 12.44 | 76.38 | 810 | 973.81 | 2212.55 | 19.65 | 22.47 | 21130.00 |
| 80 | Kudligi         | 14.91 | 76.39 | 586 | 511.54 | 1512.15 | 21.18 | 24.77 | 21957.53 |
| 81 | Kuppam          | 12.75 | 78.33 | 691 | 543.10 | 1287.90 | 20.50 | 23.28 | 21307.46 |
| 82 | Kurnool         | 15.83 | 78.04 | 284 | 377.10 | 1162.30 | 21.44 | 25.21 | 22025.45 |
| 83 | Kurud           | 20.83 | 81.72 | 300 | 838.42 | 2144.35 | 18.21 | 22.36 | 21400.00 |

|     |                   |       |       |     |         |         |       |       |          |
|-----|-------------------|-------|-------|-----|---------|---------|-------|-------|----------|
| 84  | Kurundwad         | 16.68 | 74.59 | 543 | 352.90  | 984.40  | 20.34 | 24.17 | 21961.22 |
| 85  | Lonavala          | 18.75 | 73.41 | 630 | 1012.45 | 1963.75 | 17.60 | 20.40 | 21236.67 |
| 86  | Madakasira        | 13.94 | 77.27 | 665 | 699.03  | 1881.85 | 20.34 | 23.85 | 22329.47 |
| 87  | Maddikera         | 15.25 | 77.42 | 461 | 517.99  | 1488.10 | 20.76 | 24.44 | 22053.42 |
| 88  | Maddur            | 12.58 | 77.04 | 633 | 463.07  | 1294.90 | 20.71 | 24.30 | 22851.56 |
| 89  | Madha             | 18.03 | 75.52 | 488 | 777.95  | 2165.40 | 19.31 | 23.54 | 21909.01 |
| 90  | Magadi            | 12.96 | 77.23 | 854 | 894.32  | 2250.90 | 19.87 | 23.11 | 21327.12 |
| 91  | Malavalli         | 12.38 | 77.04 | 622 | 964.74  | 2239.45 | 19.72 | 22.70 | 21690.00 |
| 92  | Malur             | 13.00 | 77.94 | 905 | 890.84  | 2236.05 | 19.60 | 22.98 | 21408.47 |
| 93  | Medchal           | 17.63 | 78.48 | 576 | 914.10  | 2236.95 | 19.10 | 22.67 | 21239.17 |
| 94  | Medha             | 17.79 | 73.83 | 710 | 1006.17 | 2222.50 | 19.94 | 22.55 | 21333.33 |
| 95  | Miraj             | 16.81 | 74.64 | 553 | 443.88  | 1277.25 | 19.78 | 24.02 | 22190.63 |
| 96  | Mudhol            | 16.33 | 75.28 | 544 | 457.72  | 1287.95 | 20.40 | 24.19 | 22268.75 |
| 97  | Mudigere          | 13.13 | 75.64 | 960 | 1027.02 | 2080.00 | 18.67 | 21.37 | 22281.67 |
| 98  | Mundargi          | 15.2  | 75.88 | 524 | 849.45  | 2251.65 | 20.03 | 23.61 | 21625.22 |
| 99  | Murbad            | 19.26 | 73.38 | 61  | 530.17  | 1520.30 | 20.71 | 24.32 | 21524.00 |
| 100 | Mysore            | 12.29 | 76.63 | 733 | 688.56  | 1758.85 | 19.97 | 23.37 | 22467.03 |
| 101 | Nalgonda          | 17.05 | 79.26 | 375 | 466.78  | 1236.00 | 20.08 | 23.68 | 21990.48 |
| 102 | Nanded            | 19.13 | 77.32 | 351 | 803.46  | 2142.25 | 19.36 | 23.34 | 21481.08 |
| 103 | Nanjangud         | 12.11 | 76.68 | 649 | 564.97  | 1422.15 | 20.26 | 23.54 | 22184.93 |
| 104 | Narasinharajapura | 13.6  | 75.5  | 688 | 938.13  | 2283.30 | 19.92 | 23.06 | 22939.17 |
| 105 | Nargund           | 15.72 | 75.38 | 603 | 722.35  | 1973.90 | 19.70 | 23.58 | 22508.91 |
| 106 | Navalgund         | 15.56 | 75.35 | 575 | 548.11  | 1478.60 | 19.95 | 23.77 | 22312.00 |
| 107 | Ne lamangala      | 13.08 | 77.41 | 866 | 894.97  | 2219.50 | 19.50 | 22.84 | 21191.53 |
| 108 | Niphad            | 20.07 | 74.1  | 554 | 855.50  | 2088.60 | 16.91 | 21.44 | 21457.50 |
| 109 | Osmanabad         | 18.1  | 76.03 | 655 | 737.31  | 1916.60 | 18.61 | 22.83 | 21730.39 |
| 110 | Palacode          | 12.29 | 78.07 | 491 | 451.36  | 1328.80 | 21.35 | 24.83 | 22934.38 |
| 111 | Palliwada Pro     | 17.2  | 79.18 | 263 | 625.75  | 1817.00 | 20.87 | 24.46 | 21555.06 |
| 112 | Panvel            | 18.98 | 73.11 | 12  | 471.22  | 1354.15 | 21.21 | 24.58 | 21637.88 |

|     |                      |       |       |     |         |         |       |       |          |
|-----|----------------------|-------|-------|-----|---------|---------|-------|-------|----------|
| 113 | Paud                 | 18.52 | 73.61 | 579 | 597.83  | 1337.95 | 17.77 | 21.43 | 21844.16 |
| 114 | Peddapalli           | 18.61 | 79.38 | 228 | 851.99  | 2326.05 | 19.79 | 23.58 | 21389.08 |
| 115 | Pennagaram           | 12.13 | 77.89 | 496 | 637.88  | 1819.40 | 21.11 | 24.49 | 22264.04 |
| 116 | Periyanaickampalayam | 11.15 | 76.93 | 431 | 695.09  | 1783.45 | 20.50 | 23.64 | 21550.55 |
| 117 | Phaltan              | 17.98 | 74.43 | 554 | 534.42  | 1417.60 | 19.45 | 23.47 | 21926.03 |
| 118 | Pimpalner            | 20.94 | 74.12 | 517 | 492.86  | 1371.45 | 17.26 | 22.34 | 21726.67 |
| 119 | Pune                 | 18.52 | 73.85 | 559 | 911.06  | 2183.00 | 18.43 | 22.23 | 21592.50 |
| 120 | Punganur             | 13.36 | 78.57 | 720 | 966.32  | 2176.25 | 19.01 | 22.17 | 21266.67 |
| 121 | Pusad                | 19.91 | 77.56 | 335 | 863.29  | 2327.30 | 19.45 | 23.43 | 21302.50 |
| 122 | Pusesauali           | 17.46 | 74.31 | 716 | 917.02  | 2290.35 | 19.64 | 23.12 | 21833.33 |
| 123 | Puttur1              | 13.43 | 79.55 | 145 | 445.93  | 1171.25 | 21.27 | 24.26 | 21687.93 |
| 124 | Radhanagari          | 16.41 | 73.99 | 564 | 720.04  | 1565.30 | 19.10 | 22.04 | 21967.82 |
| 125 | Raibag               | 16.49 | 74.77 | 571 | 403.59  | 999.50  | 19.95 | 23.30 | 21936.54 |
| 126 | Raichur              | 16.21 | 77.34 | 388 | 548.52  | 1591.55 | 21.31 | 24.72 | 21641.56 |
| 127 | Ramanagaram          | 12.7  | 77.28 | 668 | 943.36  | 2291.55 | 20.11 | 23.13 | 21808.33 |
| 128 | Ramdurg              | 15.95 | 75.29 | 569 | 622.50  | 1814.90 | 20.73 | 24.44 | 22200.00 |
| 129 | Ranebennur           | 14.61 | 75.63 | 577 | 624.01  | 1597.60 | 19.78 | 23.30 | 22583.13 |
| 130 | Risod                | 19.97 | 76.78 | 530 | 452.38  | 1355.60 | 18.99 | 23.70 | 21560.87 |
| 131 | Sangamner            | 19.57 | 74.2  | 559 | 485.19  | 1435.35 | 18.02 | 23.19 | 21912.00 |
| 132 | Sangli               | 16.85 | 74.58 | 565 | 524.97  | 1340.45 | 19.89 | 23.48 | 21843.48 |
| 133 | Satara               | 17.68 | 74.01 | 687 | 1027.46 | 2159.60 | 19.41 | 22.03 | 21278.33 |
| 134 | Sendamangalam        | 11.28 | 78.23 | 179 | 428.44  | 1200.55 | 21.73 | 24.77 | 22651.72 |
| 135 | Shahapur             | 19.45 | 73.32 | 54  | 388.28  | 1058.55 | 20.45 | 24.05 | 21641.51 |
| 136 | Shevgaon             | 19.35 | 75.21 | 481 | 856.26  | 2333.75 | 19.59 | 23.48 | 21230.83 |
| 137 | Shiggaon             | 14.99 | 75.22 | 610 | 655.49  | 1767.65 | 19.95 | 23.69 | 22921.11 |
| 138 | Shirala              | 16.98 | 74.12 | 593 | 650.42  | 1720.45 | 19.51 | 23.38 | 22010.11 |
| 139 | Shirol               | 16.74 | 74.59 | 551 | 556.25  | 1409.05 | 19.76 | 23.36 | 21747.95 |
| 140 | Shrigonda            | 18.61 | 74.69 | 550 | 871.93  | 2127.60 | 17.50 | 21.76 | 21916.67 |
| 141 | Siddapur             | 14.34 | 74.88 | 565 | 1003.90 | 2179.15 | 19.37 | 22.19 | 22755.83 |

|     |                 |       |       |      |         |         |       |       |          |
|-----|-----------------|-------|-------|------|---------|---------|-------|-------|----------|
| 142 | Somawarpet      | 12.59 | 75.85 | 1100 | 1021.09 | 1916.70 | 17.32 | 20.01 | 22541.67 |
| 143 | Sorab           | 14.38 | 75.1  | 591  | 865.83  | 2357.90 | 20.33 | 23.85 | 23031.09 |
| 144 | Sringeri        | 13.41 | 75.25 | 632  | 987.10  | 2251.05 | 20.05 | 22.79 | 22497.50 |
| 145 | Srirangapatna   | 12.42 | 76.69 | 667  | 581.43  | 1470.35 | 20.08 | 23.40 | 22618.42 |
| 146 | Sukma           | 18.39 | 81.65 | 192  | 646.50  | 1711.05 | 19.37 | 23.27 | 21688.76 |
| 147 | Tarikere        | 13.7  | 75.81 | 663  | 571.33  | 1366.75 | 19.24 | 22.78 | 22834.25 |
| 148 | Thathaiengarpet | 11.12 | 78.44 | 134  | 453.13  | 1162.80 | 21.21 | 24.12 | 21684.48 |
| 149 | Tiptur          | 13.26 | 76.47 | 845  | 477.16  | 1248.25 | 19.93 | 23.57 | 22389.06 |
| 150 | Tiruchengode    | 11.37 | 77.89 | 242  | 375.84  | 1235.65 | 22.30 | 25.75 | 23222.81 |
| 151 | Tiruppattur     | 10.1  | 78.59 | 94   | 411.55  | 1217.35 | 21.41 | 24.63 | 21806.78 |
| 152 | Tiruttani       | 13.17 | 79.61 | 109  | 417.31  | 1215.75 | 21.87 | 25.03 | 22500.00 |
| 153 | Trimbak         | 19.93 | 73.53 | 709  | 979.61  | 1962.45 | 17.12 | 20.39 | 21193.33 |
| 154 | Tumkur          | 13.33 | 77.11 | 818  | 913.22  | 2201.40 | 19.51 | 22.85 | 21757.26 |
| 155 | Turuvekere      | 13.16 | 76.66 | 785  | 661.88  | 1781.80 | 19.87 | 23.62 | 23189.01 |
| 156 | Uppilyapuram    | 11.26 | 78.51 | 170  | 508.26  | 1246.95 | 20.62 | 23.55 | 22229.69 |
| 157 | Uttangarai      | 12.26 | 78.53 | 327  | 405.63  | 1223.35 | 21.43 | 24.73 | 21654.24 |
| 158 | Vada            | 19.65 | 73.14 | 55   | 468.55  | 1287.20 | 20.64 | 24.18 | 21490.63 |
| 159 | Vadgaon         | 18.73 | 73.63 | 631  | 880.05  | 2132.95 | 17.68 | 21.81 | 21651.67 |
| 160 | Vainiyambadi    | 12.69 | 78.62 | 335  | 415.48  | 1210.65 | 21.29 | 24.52 | 21664.41 |
| 161 | Vellore         | 12.91 | 79.13 | 214  | 487.81  | 1298.30 | 21.49 | 24.35 | 21551.56 |
| 162 | Wai             | 17.94 | 73.89 | 697  | 1001.74 | 2236.50 | 20.07 | 22.67 | 21315.83 |
| 163 | Wallajah        | 12.91 | 79.35 | 154  | 478.83  | 1317.75 | 21.86 | 24.65 | 21500.00 |
| 164 | Warora          | 20.24 | 79.01 | 203  | 877.13  | 1959.85 | 16.66 | 20.79 | 21316.24 |
| 165 | Yadki           | 15.03 | 77.52 | 301  | 372.11  | 1177.85 | 21.86 | 25.49 | 22236.36 |
| 166 | Yeola           | 20.04 | 74.48 | 560  | 894.55  | 2165.50 | 18.07 | 22.08 | 21077.50 |

**Class #8 (Locations: 15)**

| Sr No | Station             | Lat   | Long  | Alt    | P days<br>(7,21,30) | GDD (4 deg C base<br>temp) | Mean Night<br>temp | Mean T      | Mean radn<br>(Kj/day/m2) |
|-------|---------------------|-------|-------|--------|---------------------|----------------------------|--------------------|-------------|--------------------------|
| 1     | Aryankavu           | 8.98  | 77.15 | 255.00 | 434.6183866         | 928.35                     | 21.40153061        | 23.02755102 | 12095.91837              |
| 2     | Dharamsala<br>Lower | 32.11 | 76.28 | 702.00 | 1004.657664         | 2031.3                     | 18.96416667        | 20.96083333 | 13129.16667              |
| 3     | Gundlupet           | 11.81 | 76.69 | 782.00 | 1048.381303         | 2131.25                    | 19.88354167        | 21.79375    | 12865                    |
| 4     | Hamirpur            | 31.69 | 76.52 | 763.00 | 866.1490415         | 1747.3                     | 16.57675439        | 19.3622807  | 12540.35088              |
| 5     | Jammu               | 32.73 | 74.86 | 307.00 | 677.2372816         | 1461.85                    | 16.66929348        | 19.93315217 | 13161.95652              |
| 6     | Jorhat              | 26.75 | 94.20 | 78     | 986.6651224         | 1805.75                    | 16.02979167        | 19.08125    | 13177.56113              |
| 7     | Kalyani             | 22.98 | 88.43 | 9      | 877.7916656         | 2151.15                    | 17.814375          | 21.95958333 | 13115.61622              |
| 8     | Matherau            | 18.98 | 73.27 | 760    | 1090.862357         | 2136.9                     | 20.105             | 21.84083333 | 13283.33333              |
| 9     | Muhammadpur         | 28.41 | 76.98 | 219    | 876.4839088         | 1742.6                     | 14.7025            | 13.09764706 | 12474.70588              |
| 10    | Mustafabad          | 28.71 | 77.26 | 212    | 874.5087444         | 1717.85                    | 14.70395833        | 11.71196809 | 12018.61702              |
| 11    | Muzaffarpur         | 26.12 | 85.36 | 52     | 905.3169734         | 1886.65                    | 16.03770833        | 14.2810241  | 13683.13253              |
| 12    | Pantnagar           | 29.02 | 79.49 | 222    | 877.7916656         | 2151.15                    | 17.814375          | 21.95958333 | 13115.61622              |
| 13    | Pasighat            | 28.06 | 95.32 | 157    | 894.6672436         | 1769.25                    | 16.925             | 19.69247788 | 13312.38938              |
| 14    | Supa                | 20.99 | 73.03 | 17     | 410.0275438         | 823.15                     | 20.66833333        | 22.38111111 | 12782.22222              |
| 15    | Talavadi            | 21.66 | 74.51 | 199    | 798.7607304         | 1745                       | 21.04673913        | 23.01086957 | 12930.43478              |

**Class #9 (Locations: 16)**

| Sr No | Station      | Lat   | Long  | Alt     | P days<br>(7,21,30) | GDD (4 deg C<br>base temp) | Mean Night<br>temp | Mean T   | Mean radn (Kj/day/m2) |
|-------|--------------|-------|-------|---------|---------------------|----------------------------|--------------------|----------|-----------------------|
| 1     | Banjar       | 31.38 | 77.20 | 1520.00 | 1027.576            | 2142.6                     | 19.88875           | 21.88833 | 11961.66667           |
| 2     | Berinag      | 29.77 | 80.05 | 1703.00 | 771.3936            | 1423.5                     | 14.82762           | 17.59524 | 12533.33333           |
| 3     | Gulabgarh    | 30.58 | 76.86 | 298.00  | 838.292             | 1609.5                     | 14.35625           | 17.44583 | 10929.16667           |
| 4     | Holenarsipur | 12.78 | 76.24 | 836.00  | 838.9473            | 1664.1                     | 20.51413           | 22.13152 | 10752.17391           |
| 5     | Hunsur       | 12.30 | 76.29 | 770.00  | 830.2219            | 1699.7                     | 20.8337            | 22.51848 | 10978.26087           |
| 6     | Kausani      | 29.84 | 79.60 | 1682.00 | 890.0802            | 1463.25                    | 14.04396           | 16.22708 | 10679.16667           |
| 7     | Kotgarh      | 31.31 | 77.47 | 1928.00 | 1062.275            | 1775.5                     | 17.15375           | 18.82917 | 10301.66667           |
| 8     | Kotkhai      | 31.12 | 77.54 | 1721.00 | 1054.032            | 1960.45                    | 18.73104           | 20.37042 | 12263.33333           |
| 9     | Kulu         | 31.96 | 77.11 | 1213.00 | 853.4055            | 1461.05                    | 13.64813           | 16.19458 | 12195                 |
| 10    | Kurseong     | 26.88 | 88.28 | 1543.00 | 980.6337            | 1765.6                     | 16.1625            | 18.74667 | 10731.66667           |
| 11    | Multai       | 21.77 | 78.25 | 753     | 923.7822            | 1837.25                    | 15.86271           | 10.79651 | 11156.27907           |
| 12    | Nagar        | 31.21 | 77.07 | 1174    | 718.8786            | 1189.95                    | 11.25938           | 12.13007 | 11633.33333           |
| 13    | Nagina       | 29.44 | 78.43 | 247     | 875.4053            | 1713.35                    | 14.85521           | 11.04196 | 10750.75377           |
| 14    | Pedong       | 27.15 | 88.61 | 1427    | 1108.601            | 2046.6                     | 19.67083           | 21.08833 | 10527.5               |
| 15    | Tamenglong   | 24.98 | 93.49 | 1149    | 1074.09             | 1902.8                     | 17.99083           | 19.89    | 11185.83333           |
| 16    | Ukhrul Farm  | 25.18 | 94.13 | 1349    | 1021.071            | 1735.75                    | 16.41229           | 18.49792 | 11541.66667           |



**Class #10 (Locations: 7)**

| Sr No | Station          | Lat   | Long  | Alt     | P days (7,21,30) | GDD (4 deg C base temp) | Mean Night temp | Mean T      | Mean radn (Kj/day/m2) |
|-------|------------------|-------|-------|---------|------------------|-------------------------|-----------------|-------------|-----------------------|
| 1     | Bironkhol        | 29.84 | 79.03 | 1498.00 | 838.2441804      | 1577.75                 | 14.60520833     | 17.18125    | 12997.5               |
| 2     | Champawat        | 29.34 | 80.09 | 1652.00 | 770.4644458      | 1493.4                  | 15.22904762     | 18.26095238 | 13766.66667           |
| 3     | Kalimpong        | 27.06 | 88.47 | 1183.00 | 970.9777629      | 1594.75                 | 15.855625       | 17.32291667 | 14159.16667           |
| 4     | Kasauli          | 30.90 | 76.96 | 1821.00 | 693.7627591      | 1435.25                 | 14.54684466     | 17.97330097 | 13274.75728           |
| 5     | Mawsynram        | 25.29 | 91.58 | 1425    | 877.4291563      | 1369.6                  | 13.14541667     | 15.44666667 | 14179.16667           |
| 6     | Nowshera         | 34.07 | 74.81 | 1588    | 545.5868564      | 1325.55                 | 18.11166667     | 21.78066667 | 13897.33333           |
| 7     | Srinagar (J & K) | 34.08 | 74.80 | 1579    | 601.2770632      | 1036.35                 | 12.02201087     | 15.30815217 | 13691.37243           |

**Class #11 (Locations: 3)**

| Sr No | Station   | Lat   | Long  | Alt     | P days (7,21,30) | GDD (4 deg C base temp) | Mean Night temp | Mean T      | Mean radn (Kj/day/m2) |
|-------|-----------|-------|-------|---------|------------------|-------------------------|-----------------|-------------|-----------------------|
| 1     | Chakarata | 30.70 | 77.87 | 2127.00 | 853.4438525      | 1489.7                  | 15.23108108     | 17.45495495 | 15527.92793           |
| 2     | Dalhousie | 32.54 | 75.97 | 2022.00 | 941.4498978      | 1918                    | 17.27958333     | 20.01666667 | 14908.33333           |
| 3     | Pauri     | 30.14 | 78.77 | 1689    | 927.2204712      | 1690.35                 | 15.84979167     | 18.11958333 | 15130.83333           |

**Class #12 (Location: 1)**

| Sr No | Station    | Lat   | Long  | Alt     | P days (7,21,30) | GDD (4 deg C base temp) | Mean Night temp | Mean T | Mean radn (Kj/day/m2) |
|-------|------------|-------|-------|---------|------------------|-------------------------|-----------------|--------|-----------------------|
| 1     | Glenmorgan | 11.50 | 76.59 | 1959.00 | 836.5583785      | 1341.8                  | 12.72291667     | 15.215 | 22594.16667           |

**Class #13 (Locations: 5)**

| Sr No | Station         | Lat   | Long  | Alt    | P days (7,21,30) | GDD (4 deg C base temp) | Mean Night temp | Mean T      | Mean radn (Kj/day/m2) |
|-------|-----------------|-------|-------|--------|------------------|-------------------------|-----------------|-------------|-----------------------|
| 1     | Heggaddevankote | 12.09 | 76.32 | 701.00 | 569.9531343      | 1540.6                  | 20.34615385     | 23.8025641  | 24055.12821           |
| 2     | Jalandhar       | 31.33 | 75.58 | 233    | 700.3162133      | 1664.9                  | 13.24416667     | 17.9075     | 24968.03727           |
| 3     | Krishnarajpet   | 12.66 | 76.49 | 790.00 | 654.0795531      | 1715.6                  | 20.42643678     | 23.76551724 | 24312.64368           |
| 4     | Pimpalgaon      | 20.16 | 73.98 | 571    | 1116.494112      | 2353.75                 | 20.100625       | 24.34791667 | 24450.83333           |
| 5     | Vaduj           | 17.59 | 74.45 | 734    | 505.2555919      | 1482.4                  | 20.05608108     | 24.08648649 | 24429.72973           |

**Class #14 (Locations: 2)**

| Sr No | Station    | Lat   | Long  | Alt     | P days (7,21,30) | GDD (4 deg C base temp) | Mean Night temp | Mean T      | Mean radn (Kj/day/m2) |
|-------|------------|-------|-------|---------|------------------|-------------------------|-----------------|-------------|-----------------------|
| 1     | Kodaikanal | 10.24 | 77.49 | 2079.00 | 871.6834278      | 1426.85                 | 13.27520833     | 15.92375    | 19412.5               |
| 2     | Ootacamund | 11.4  | 76.69 | 2237    | 918.3219638      | 1544.85                 | 14.19479167     | 16.90708333 | 19005                 |

**Class #15 (Locations: 2)**

| Sr No | Station   | Lat   | Long  | Alt  | P days (7,21,30) | GDD (4 deg C base temp) | Mean Night temp | Mean T      | Mean radn (Kj/day/m2) |
|-------|-----------|-------|-------|------|------------------|-------------------------|-----------------|-------------|-----------------------|
| 1     | Mussoorie | 30.45 | 78.06 | 1984 | 938.9359072      | 1986.55                 | 17.51104167     | 11.43773148 | 6219.907407           |
| 2     | Nainital  | 29.38 | 79.46 | 1941 | 851.5831129      | 1487.25                 | 13.94770833     | 7.328066914 | 5084.386617           |
